# Supplementary material for: Streptavidin-Hosted Organocatalytic Aldol Addition
Source: MDPI journal article supplement (doi:10.3390/molecules25102457), 2020-05-25
Supplement: s1 [file s1]

Supporting Information

# Streptavidin-Hosted Organocatalytic Aldol Addition

Nicolò Santi <sup>1</sup>, Louis C. Morrill <sup>1,2</sup> and Louis Y. P. Luk <sup>1,2,\*</sup>

<sup>1</sup> School of Chemistry, Main Building, Cardiff University, Cardiff, CF10 3AT, UK; SantiN@cardiff.ac.uk (N.S.); MorrillLC@cardiff.ac.uk (L.C.M.)

<sup>2</sup> Cardiff Catalysis Institute, School of Chemistry, Main Building, Cardiff University, Cardiff, CF10 3AT, UK

\* Correspondence: lukly@cardiff.ac.uk; Tel.: +44 (0)29 2251 0161

## SDS-PAGE of T-rSav and mutants

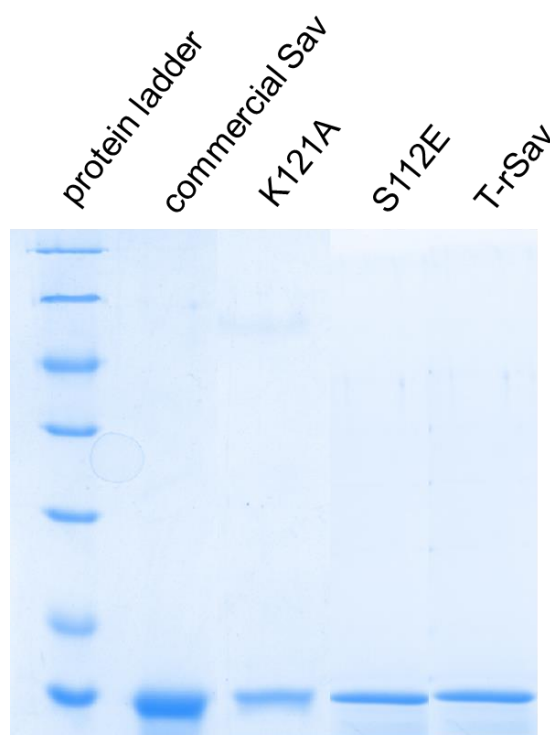

**Figure S1.** SDS-PAGE (15% w/v) for Sav (commercial Sav), T-rSav, K121A and S112E variants.

## <sup>1</sup>H NMR Spectrum of Product 3

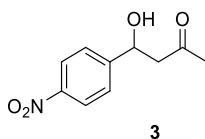

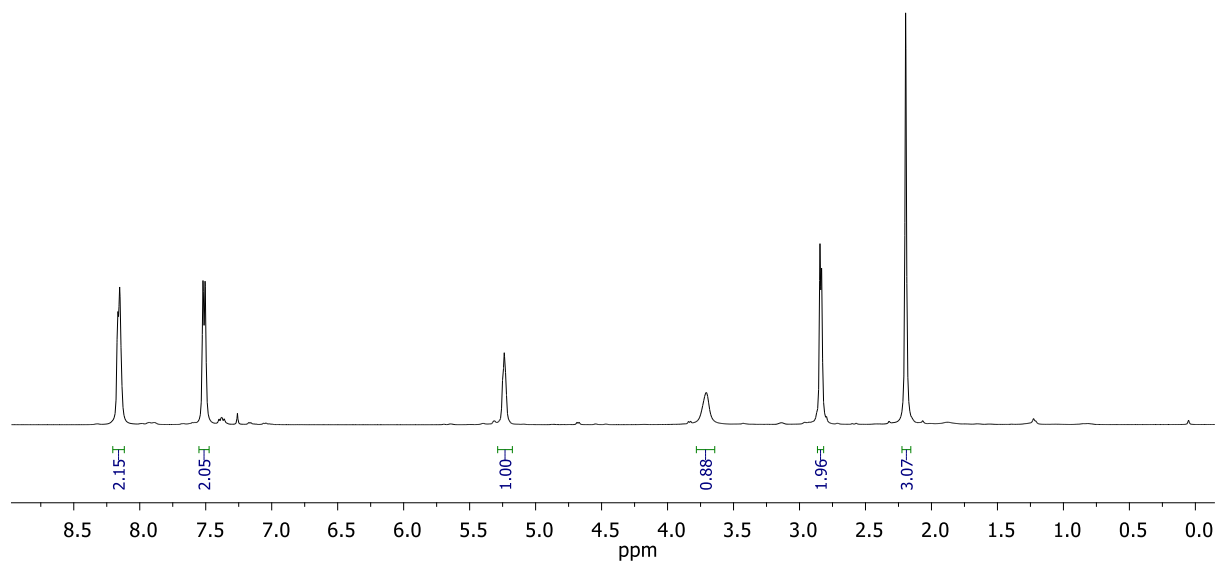

**Figure S2.**  $^1\text{H}$  NMR spectrum for the aldol product **3**.

## Chiral HPLC Data of Activity and Selectivity Screening

### *Screening Reactions*

#### Racemate **3**

Racemic samples of **3** were obtained following a known procedure, using piperidine as catalyst.

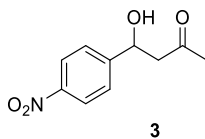

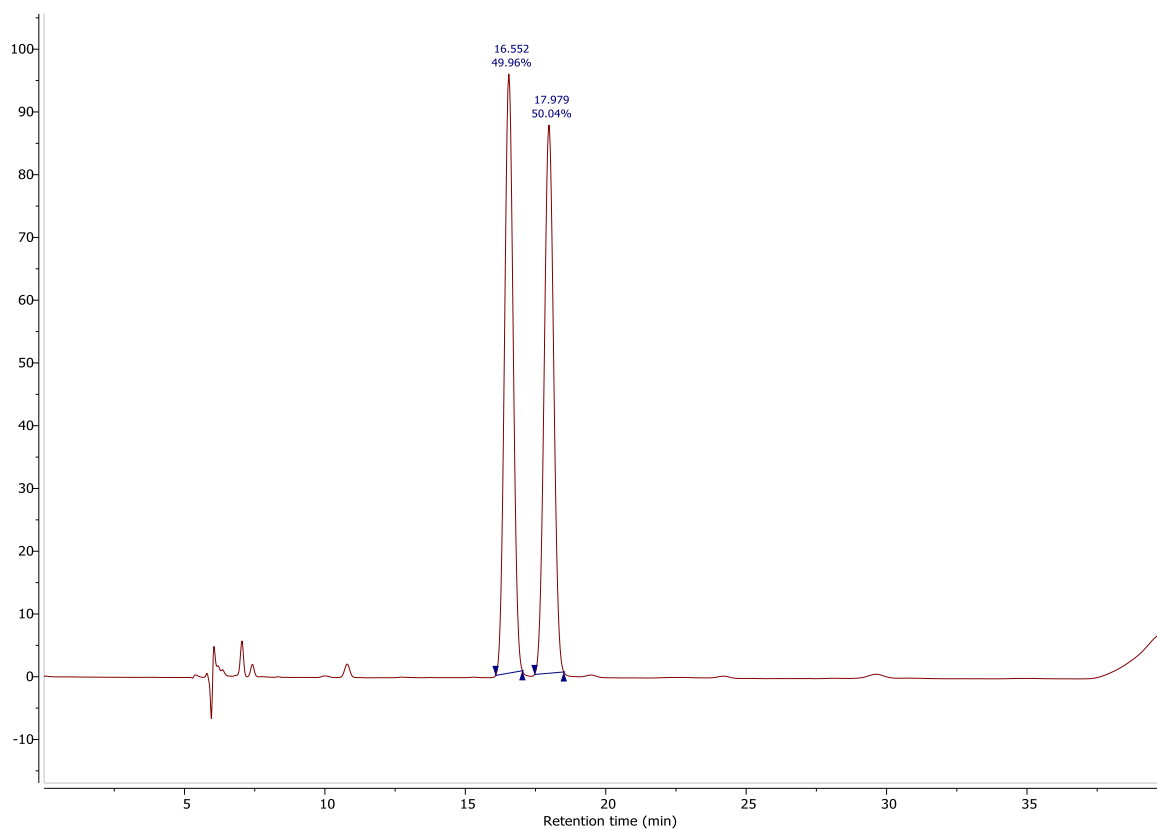

**Figure S3.** Chiral-LC spectrum for the racemate of product **3**

| Entry                     | Retention time (min) | Peak Area (%) |
|---------------------------|----------------------|---------------|
| 1 ( <i>R</i> -enantiomer) | 16.5                 | 50.0          |
| 2 ( <i>S</i> -enantiomer) | 18.0                 | 50.0          |

### L-proline

The absolute stereochemistry of **3** was assigned after running the sample obtained using L-Proline as catalyst.

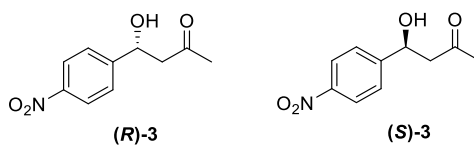

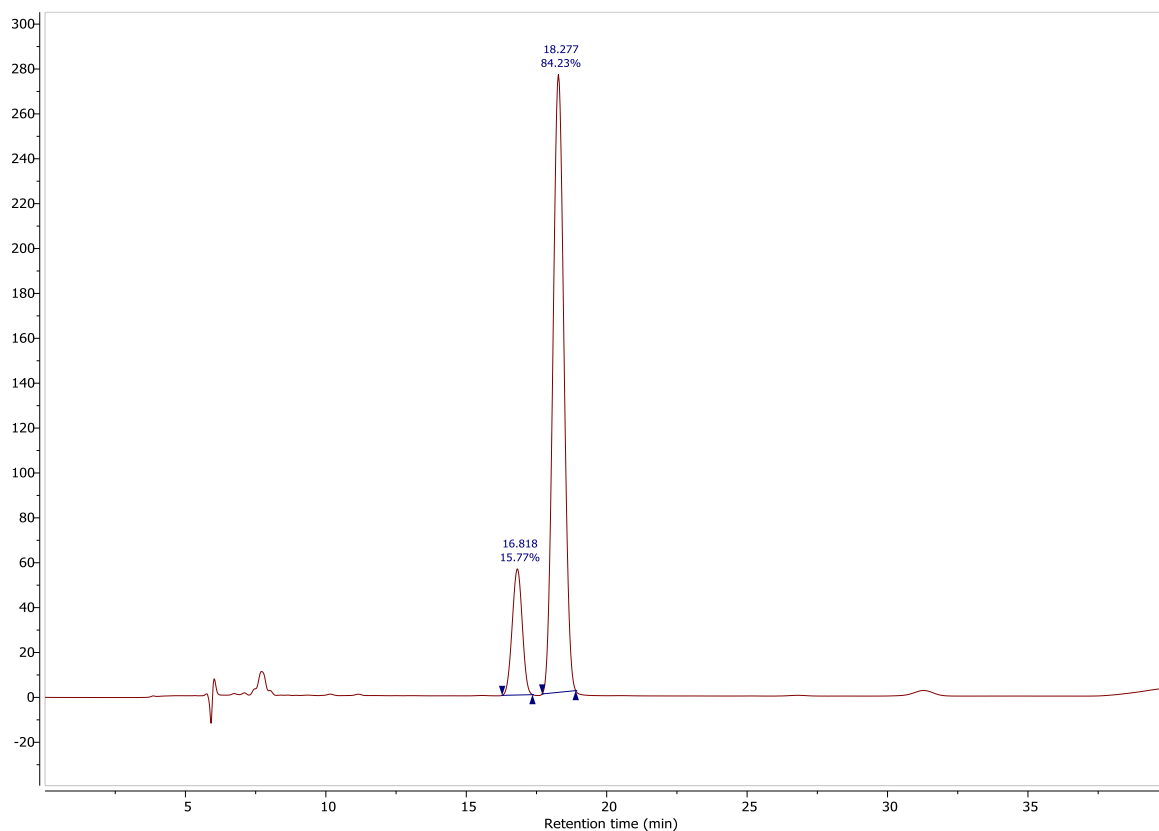

**Figure S4.** Chiral-LC spectrum for product 3 obtained using L-Proline.

| Entry                     | Retention time (min) | Peak Area (%) |
|---------------------------|----------------------|---------------|
| 1 ( <i>R</i> -enantiomer) | 16.8                 | 15.7          |
| 2 ( <i>S</i> -enantiomer) | 18.3                 | 84.3          |

**Catalyst 1 (1 mol%)**

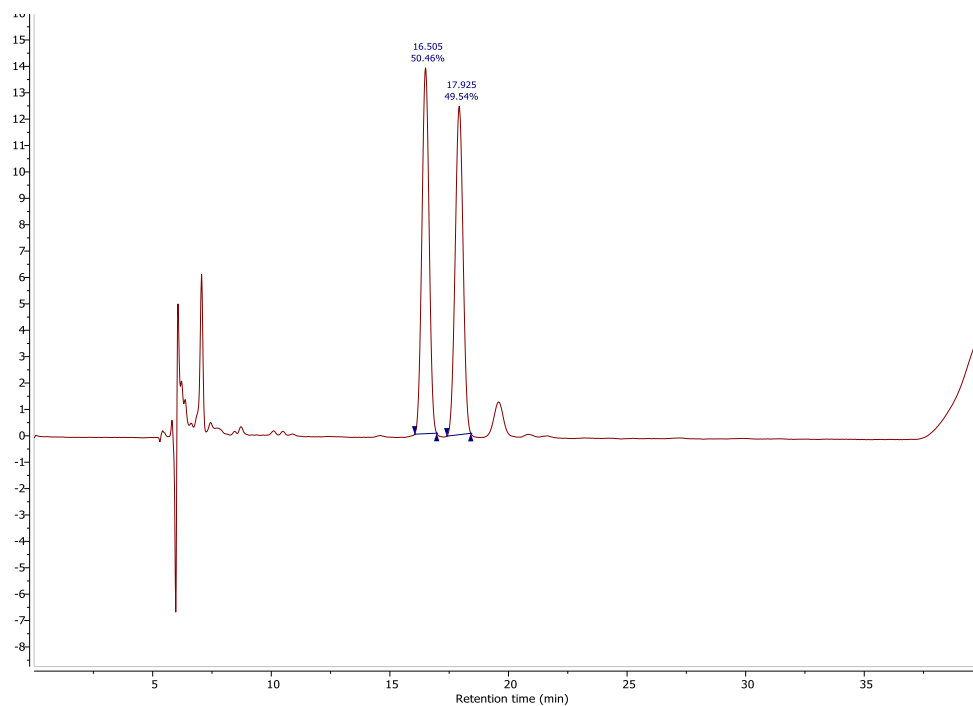

**Figure S5.** Chiral-LC spectrum for product 3 obtained using catalyst 1.

| Entry                     | Retention time (min) | Peak Area (%) |
|---------------------------|----------------------|---------------|
| 1 ( <i>R</i> -enantiomer) | 16.5                 | 50.5          |
| 2 ( <i>S</i> -enantiomer) | 17.9                 | 49.5          |

Sav (1 mol%)

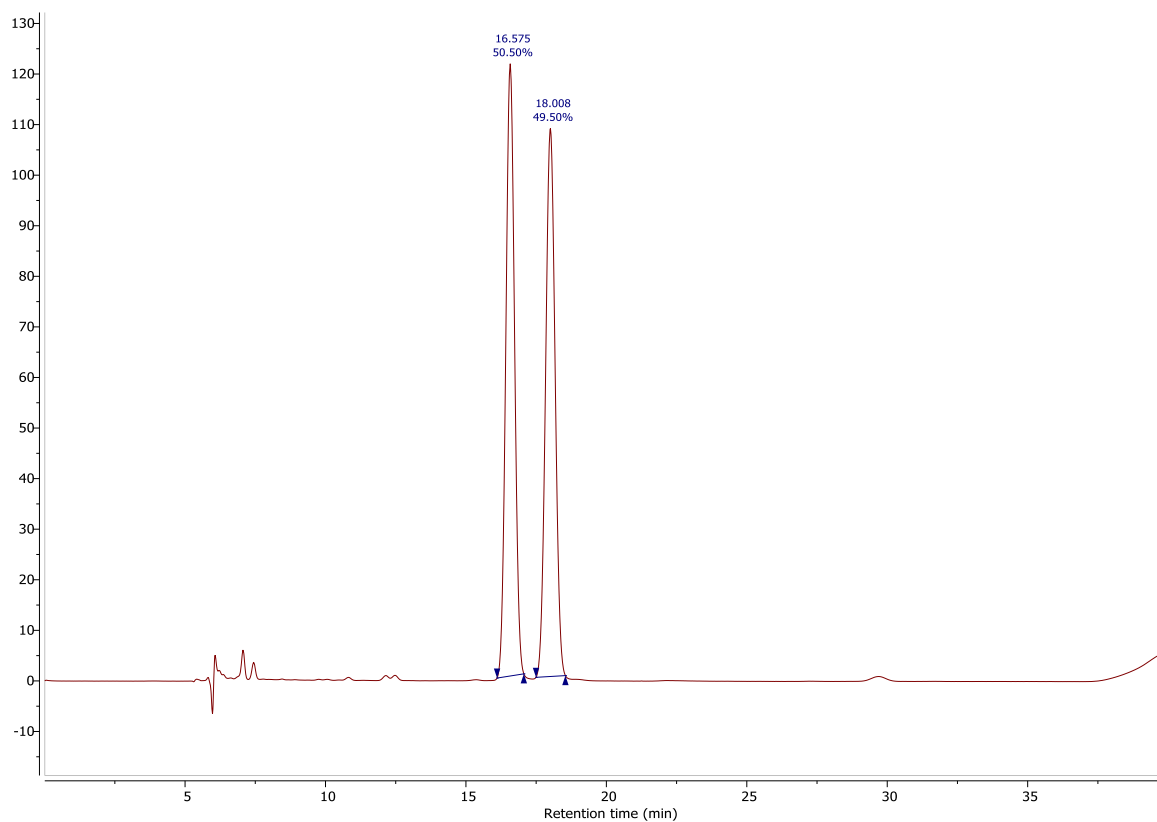

Figure S6. Chiral-LC spectrum for product **3** obtained using Sav.

| Entry                     | Retention time (min) | Peak Area (%) |
|---------------------------|----------------------|---------------|
| 1 ( <i>R</i> -enantiomer) | 16.5                 | 50.5          |
| 2 ( <i>S</i> -enantiomer) | 18.0                 | 49.5          |

Sav:1 (0.1 mol%)

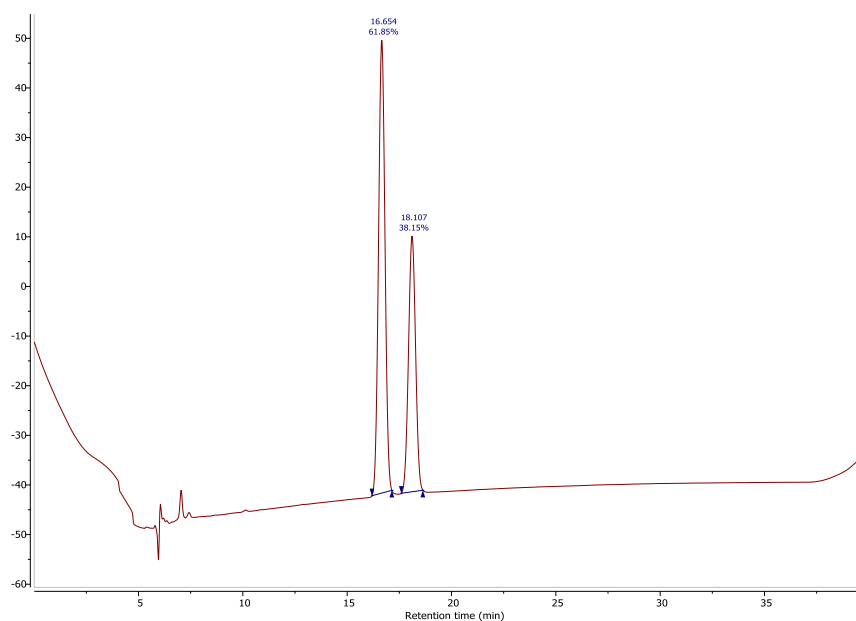

**Figure S7.** Chiral-LC spectrum for product **3** obtained using Sav:1 (0.1 mol%).

| Entry                     | Retention time (min) | Peak Area (%) |
|---------------------------|----------------------|---------------|
| 1 ( <i>R</i> -enantiomer) | 16.6                 | 61.9          |
| 2 ( <i>S</i> -enantiomer) | 18.1                 | 38.1          |

**Sav:1 (0.5 mol%)**

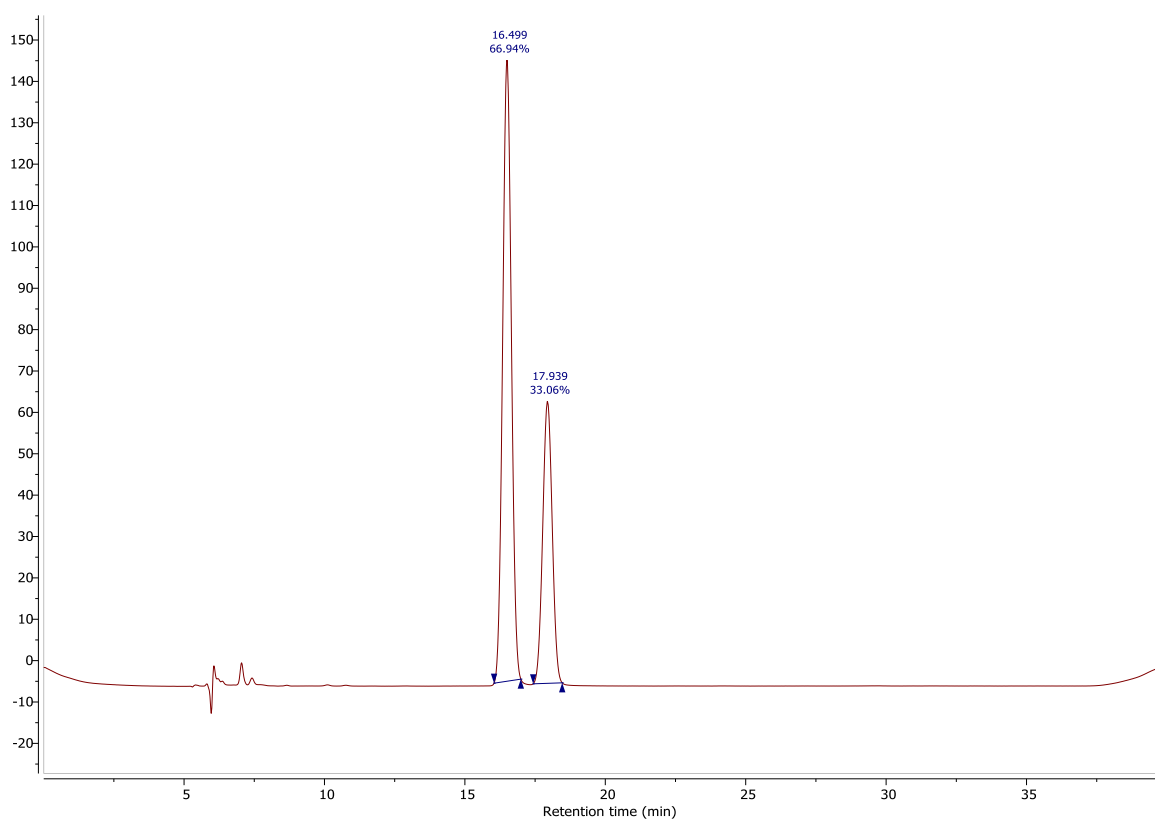

**Figure S8.** Chiral-LC spectrum for product **3** obtained using Sav:1 (0.5 mol%).

| Entry                     | Retention time (min) | Peak Area (%) |
|---------------------------|----------------------|---------------|
| 1 ( <i>R</i> -enantiomer) | 16.5                 | 67.0          |
| 2 ( <i>S</i> -enantiomer) | 17.9                 | 33.0          |

**Sav:1 (1 mol%)**

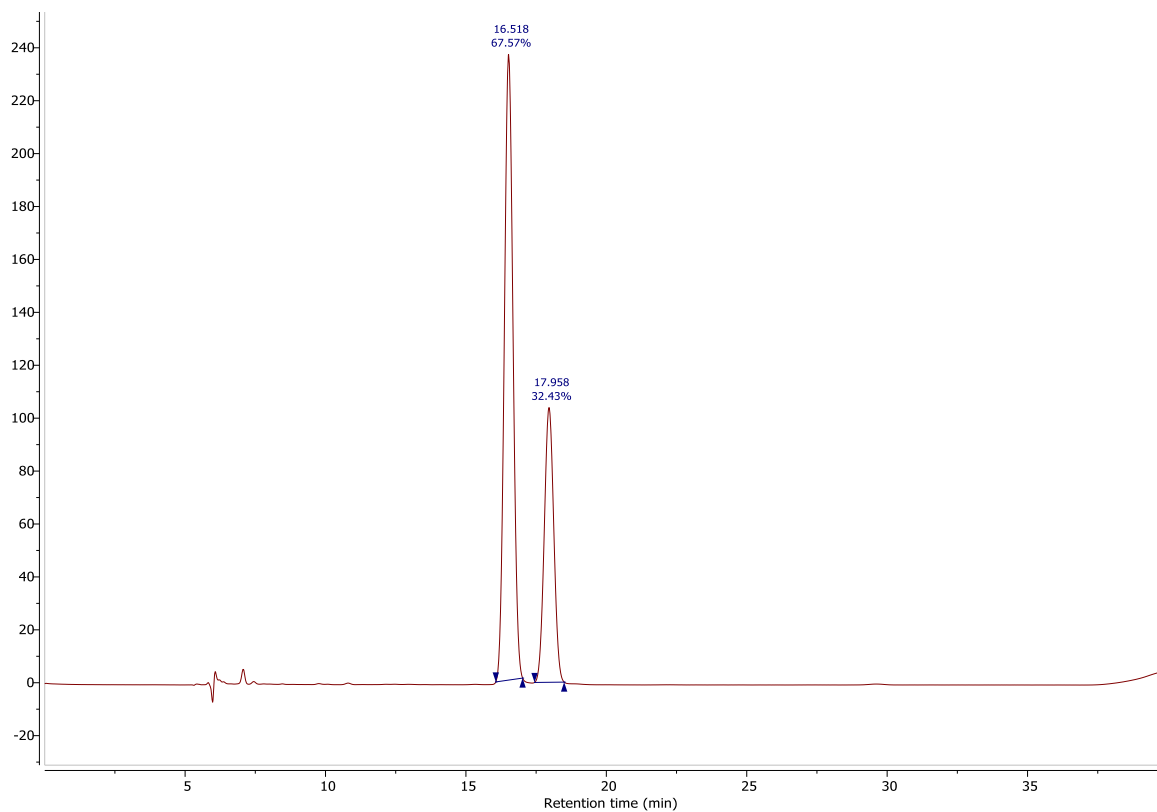

**Figure S9.** Chiral-LC spectrum for product **3** obtained using Sav:1 (1 mol%).

| Entry                     | Retention time (min) | Peak Area (%) |
|---------------------------|----------------------|---------------|
| 1 ( <i>R</i> -enantiomer) | 16.5                 | 67.6          |
| 2 ( <i>S</i> -enantiomer) | 17.9                 | 32.4          |

**Sav:1 (1 mol% + 1mol% TFA)**

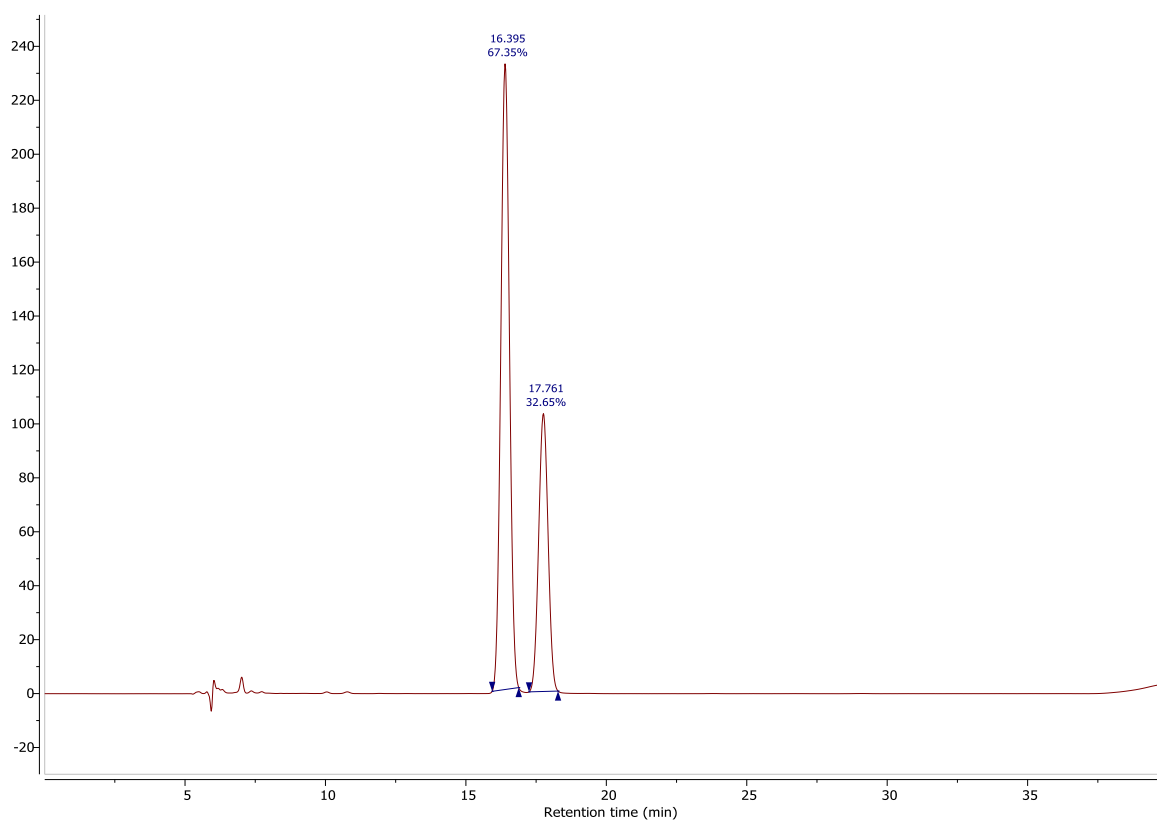

**Figure S10.** Chiral-LC spectrum for product **3** obtained using Sav:**1** (1 mol% + TFA).

| Entry                     | Retention time (min) | Peak Area (%) |
|---------------------------|----------------------|---------------|
| 1 ( <i>R</i> -enantiomer) | 16.4                 | 67.4          |
| 2 ( <i>S</i> -enantiomer) | 17.8                 | 32.6          |

**Sav:1 (1 mol%) at 10 °C**



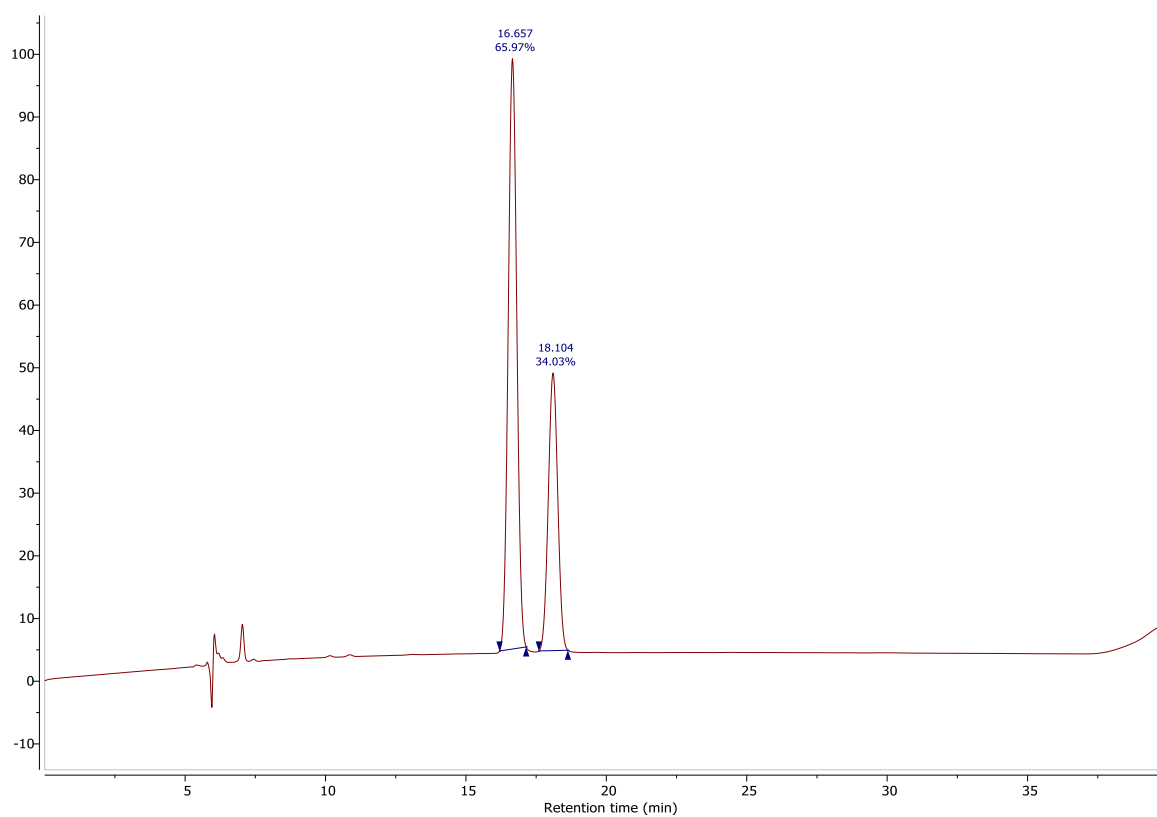

**Figure S11.** Chiral-LC spectrum for product **3** obtained using Sav:1 (1 mol%, 10 °C).

| Entry                     | Retention time (min) | Peak Area (%) |
|---------------------------|----------------------|---------------|
| 1 ( <i>R</i> -enantiomer) | 16.6                 | 66.0          |
| 2 ( <i>S</i> -enantiomer) | 18.1                 | 34.0          |

**Sav:1 (1 mol%) using 5 equivalent of acetone and 25% methanol**

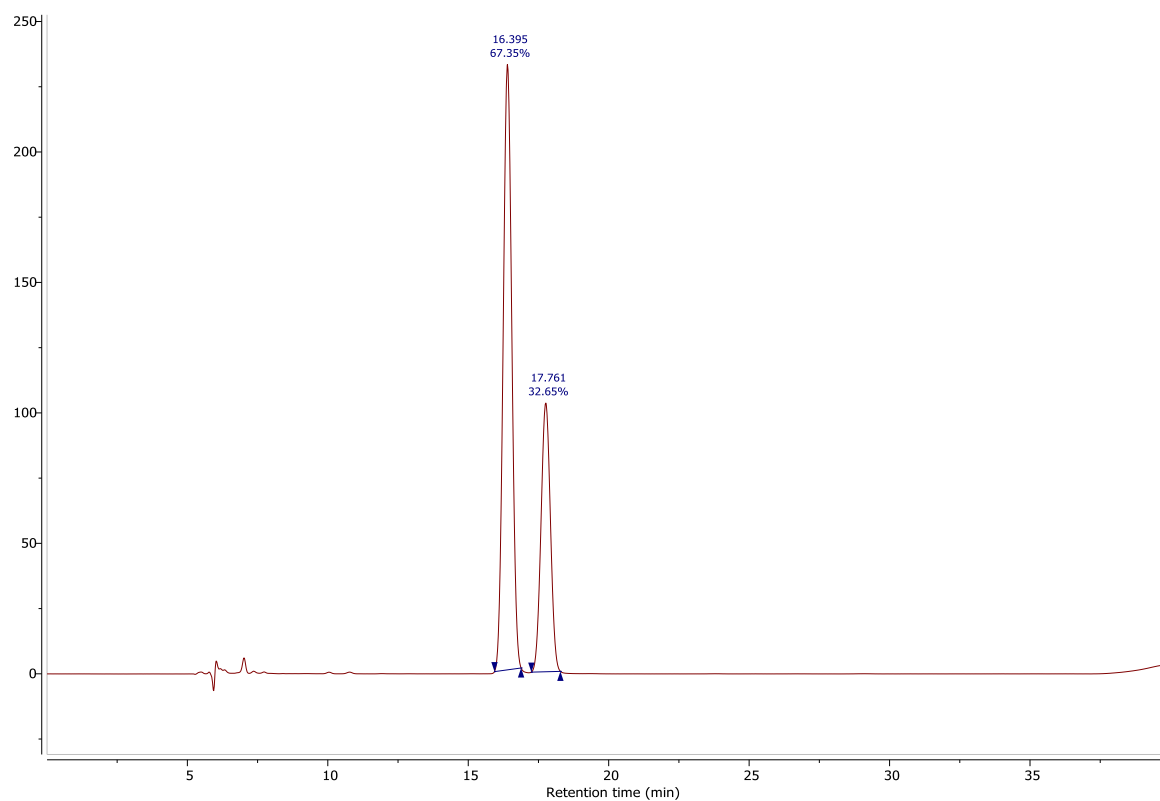

**Figure S12.** Chiral-LC spectrum for product **3** obtained using Sav:**1** (1 mol%, 5 equivalents of acetone, and 25% methanol).

| Entry                     | Retention time (min) | Peak Area (%) |
|---------------------------|----------------------|---------------|
| 1 ( <i>R</i> -enantiomer) | 16.4                 | 67.4          |
| 2 ( <i>S</i> -enantiomer) | 17.8                 | 32.6          |

Sav:**1** (1 mol%) using 5 equivalent of acetone and 25% acetonitrile

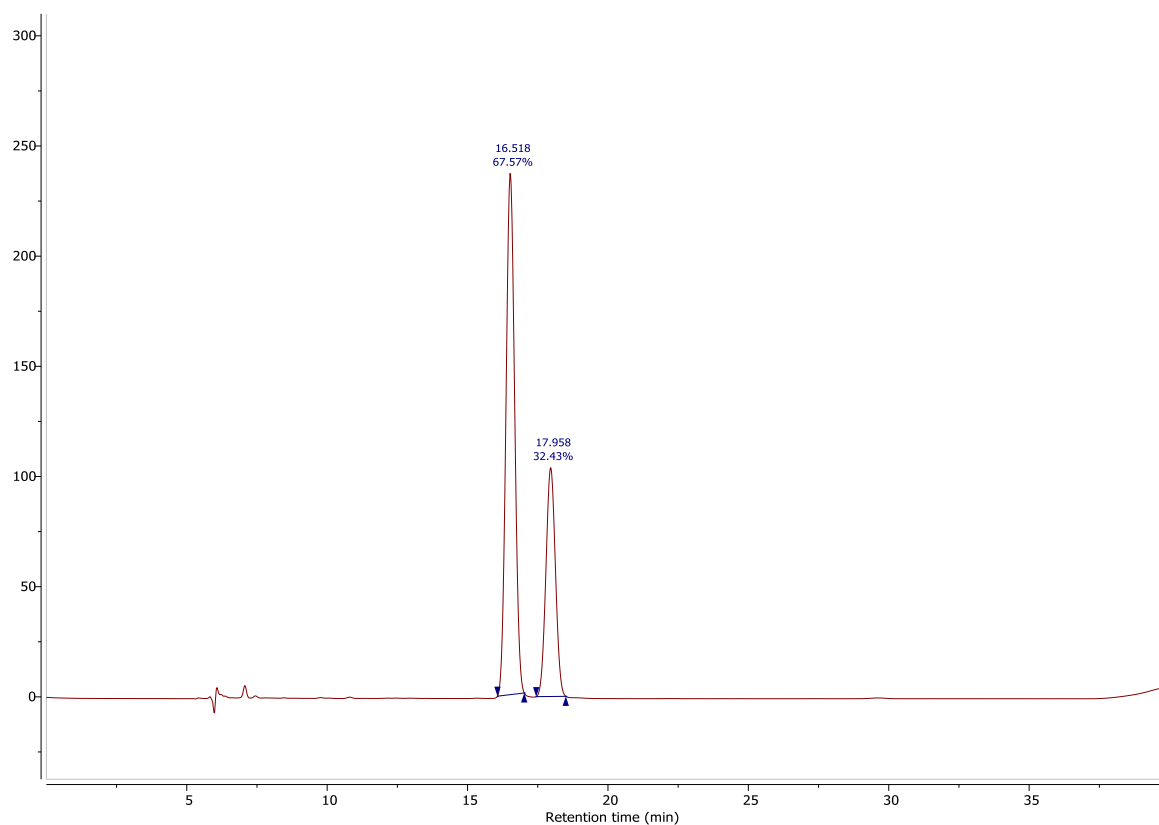

**Figure S13.** Chiral-LC spectrum for product **3** obtained using Sav:**1** (1 mol%, 5 equivalents of acetone, and 25% acetonitrile).

| Entry                     | Retention time (min) | Peak Area (%) |
|---------------------------|----------------------|---------------|
| 1 ( <i>R</i> -enantiomer) | 16.5                 | 67.6          |
| 2 ( <i>S</i> -enantiomer) | 17.9                 | 32.4          |

**Sav:1 (1 mol%) using 20 equivalent of acetone and 25% iso-propanol**

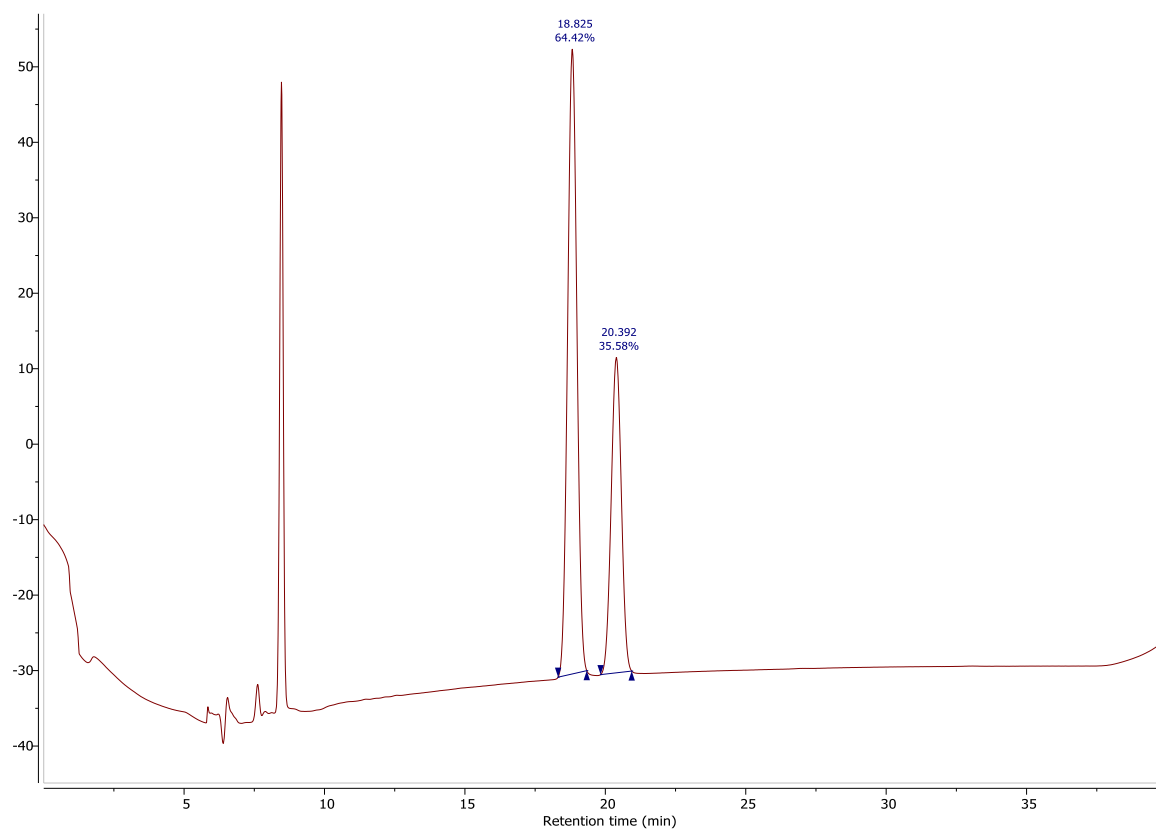

**Figure S14.** Chiral-LC spectrum for product **3** obtained using Sav:1 (1 mol%, 20 equivalents of acetone, and 25% iso-propanol).

| Entry                     | Retention time (min) | Peak Area (%) |
|---------------------------|----------------------|---------------|
| 1 ( <i>R</i> -enantiomer) | 18.8                 | 64.4          |
| 2 ( <i>S</i> -enantiomer) | 20.4                 | 35.6          |

**Sav:1 (1 mol%) using 50 equivalent of acetone and 25% iso-propanol**

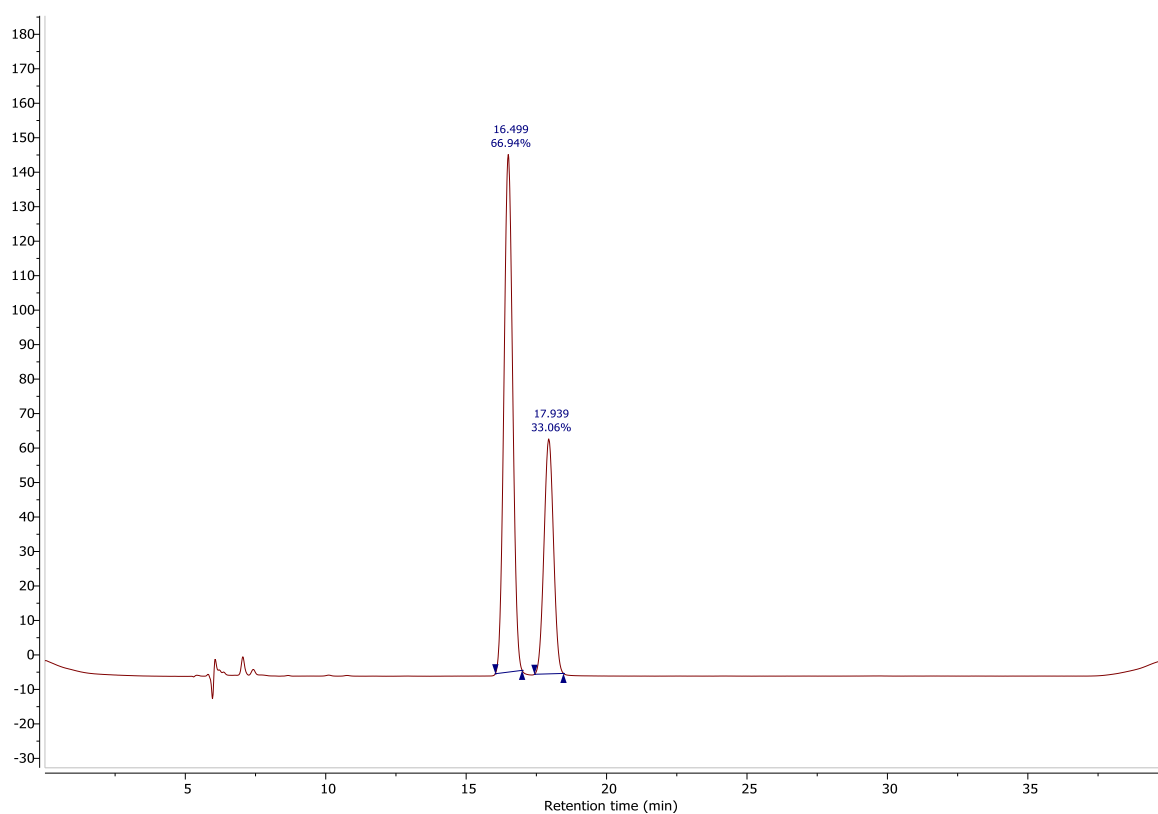

**Figure S15.** Chiral-LC spectrum for product **3** obtained using Sav:1 (1 mol%, 50 equivalents of acetone, and 25% methanol).

| Entry                     | Retention time (min) | Peak Area (%) |
|---------------------------|----------------------|---------------|
| 1 ( <i>R</i> -enantiomer) | 16.4                 | 66.9          |
| 2 ( <i>S</i> -enantiomer) | 17.9                 | 33.1          |

#### T-rSav and mutants:1 Reactions

*T-rSav:1*

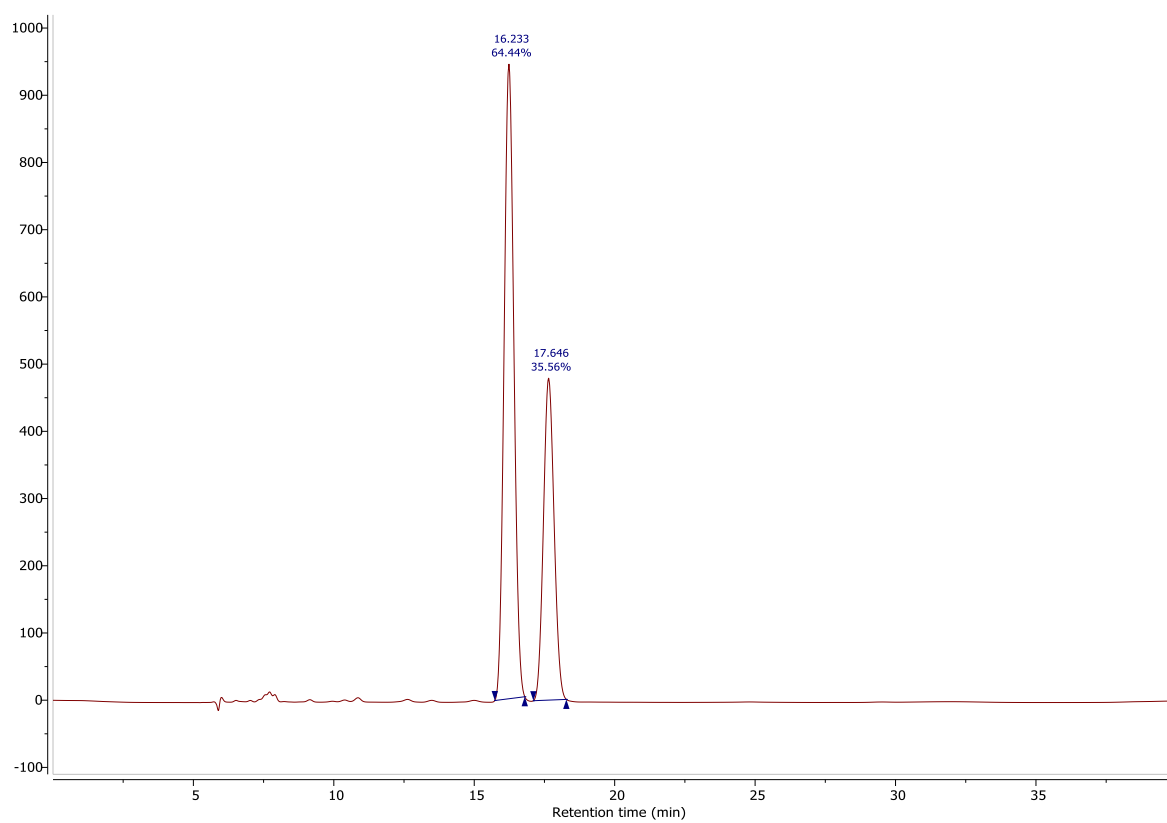

**Figure S16.** Chiral-LC spectrum for product **3** obtained using T-rSav:**1** (1 mol%).

| Entry                     | Retention time (min) | Peak Area (%) |
|---------------------------|----------------------|---------------|
| 1 ( <i>R</i> -enantiomer) | 16.2                 | 64.4          |
| 2 ( <i>S</i> -enantiomer) | 17.6                 | 35.6          |

S112E:1

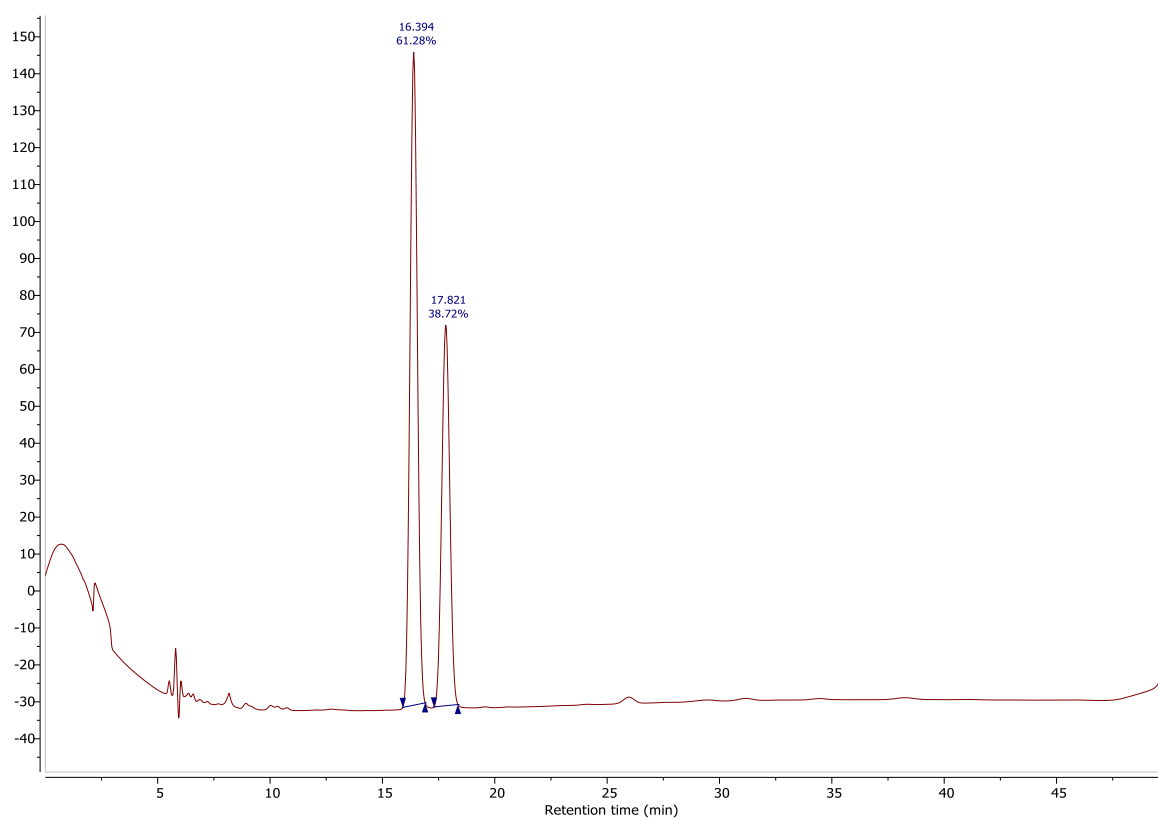

**Figure S17.** Chiral-LC spectrum for product **3** obtained using S112E:**1** (1 mol%).

| Entry                     | Retention time (min) | Peak Area (%) |
|---------------------------|----------------------|---------------|
| 1 ( <i>R</i> -enantiomer) | 16.4                 | 61.3          |
| 2 ( <i>S</i> -enantiomer) | 17.8                 | 38.7          |

K121A:1

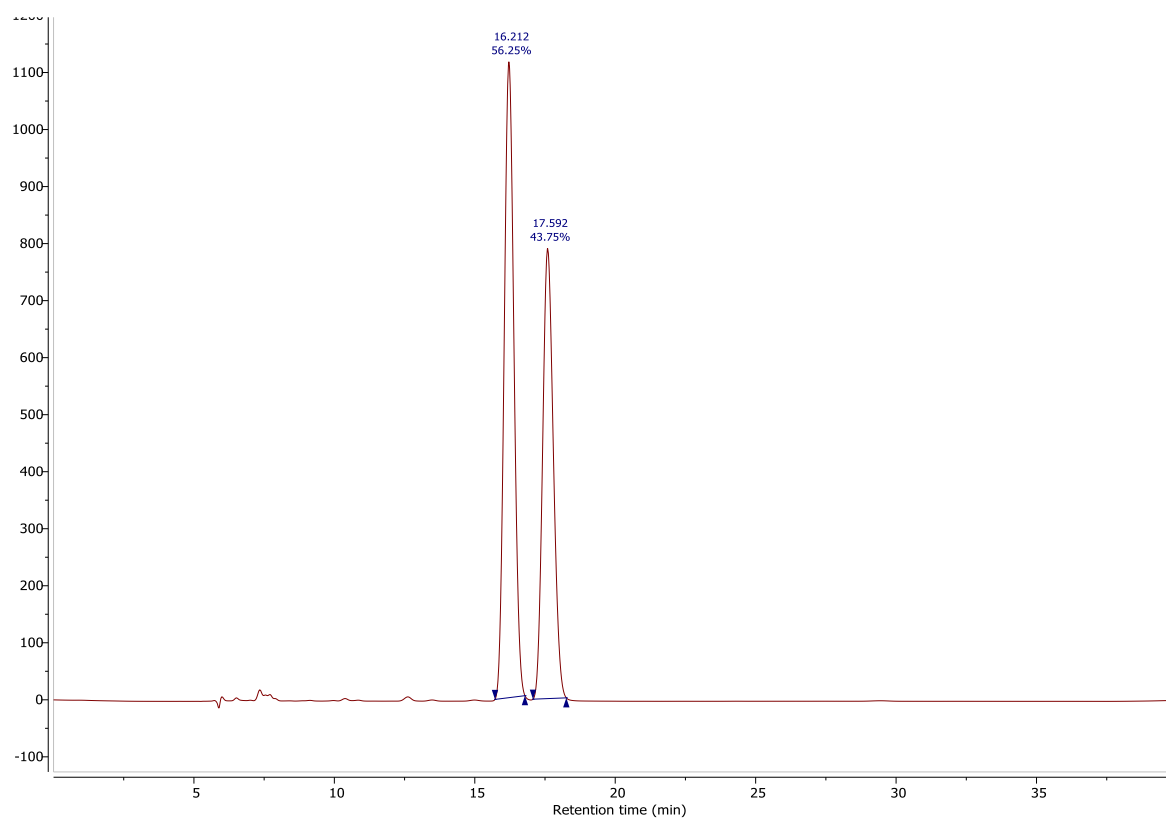

**Figure S18.** Chiral-LC spectrum for product **3** obtained using K121A:1 (1 mol%).

| Entry                     | Retention time (min) | Peak Area (%) |
|---------------------------|----------------------|---------------|
| 1 ( <i>R</i> -enantiomer) | 16.2                 | 56.2          |
| 2 ( <i>S</i> -enantiomer) | 17.6                 | 43.8          |



# **$^1\text{H}$ NMR Details for the Activity Screening of Catalysts 1 for the Aldol Addition Reaction of Acetone and *p*-Nitrobenzaldehyde**

## **Screening Reactions**

**$^1\text{H}$  NMR Spectrum after Extraction of the Reaction Mixture between *p*-Nitrobenzaldehyde and Acetone (no catalyst)**

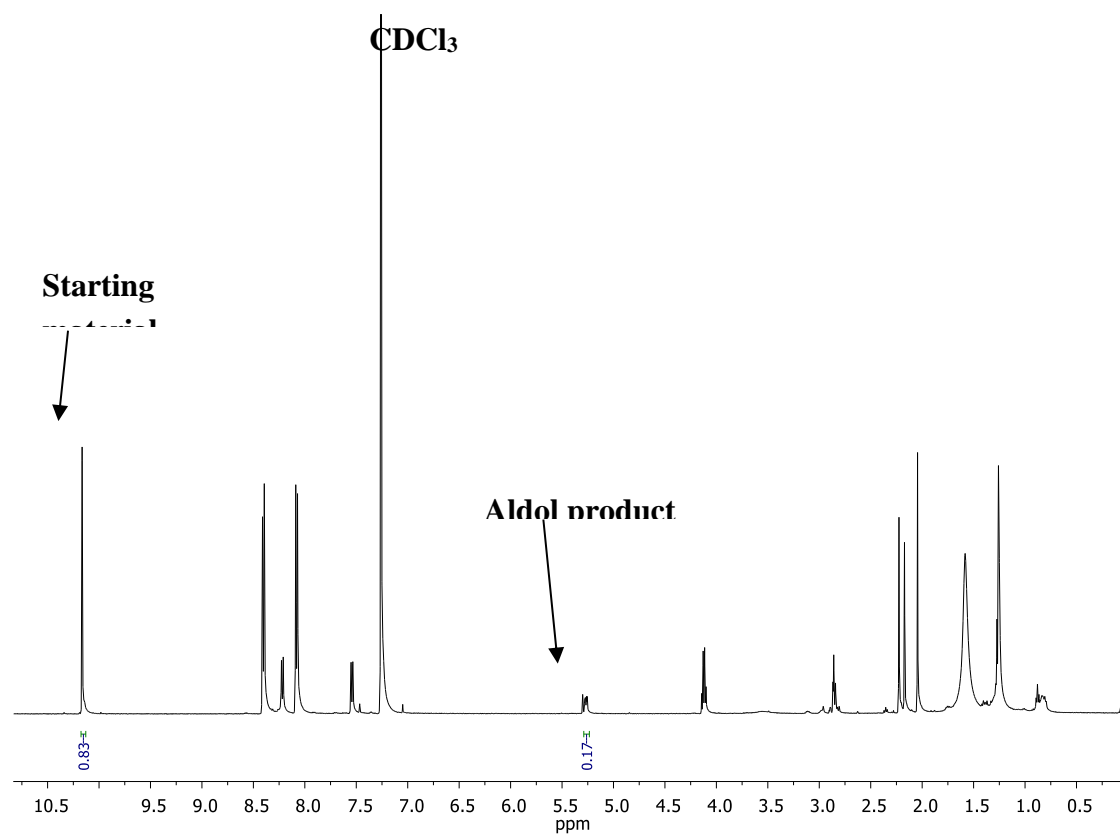

**Figure S19.**  $^1\text{H}$  NMR spectrum for the crude of reaction using no catalyst.

**$^1\text{H}$  NMR Spectrum after Extraction of the Reaction Mixture between *p*-Nitrobenzaldehyde and Acetone (catalyst 1)**

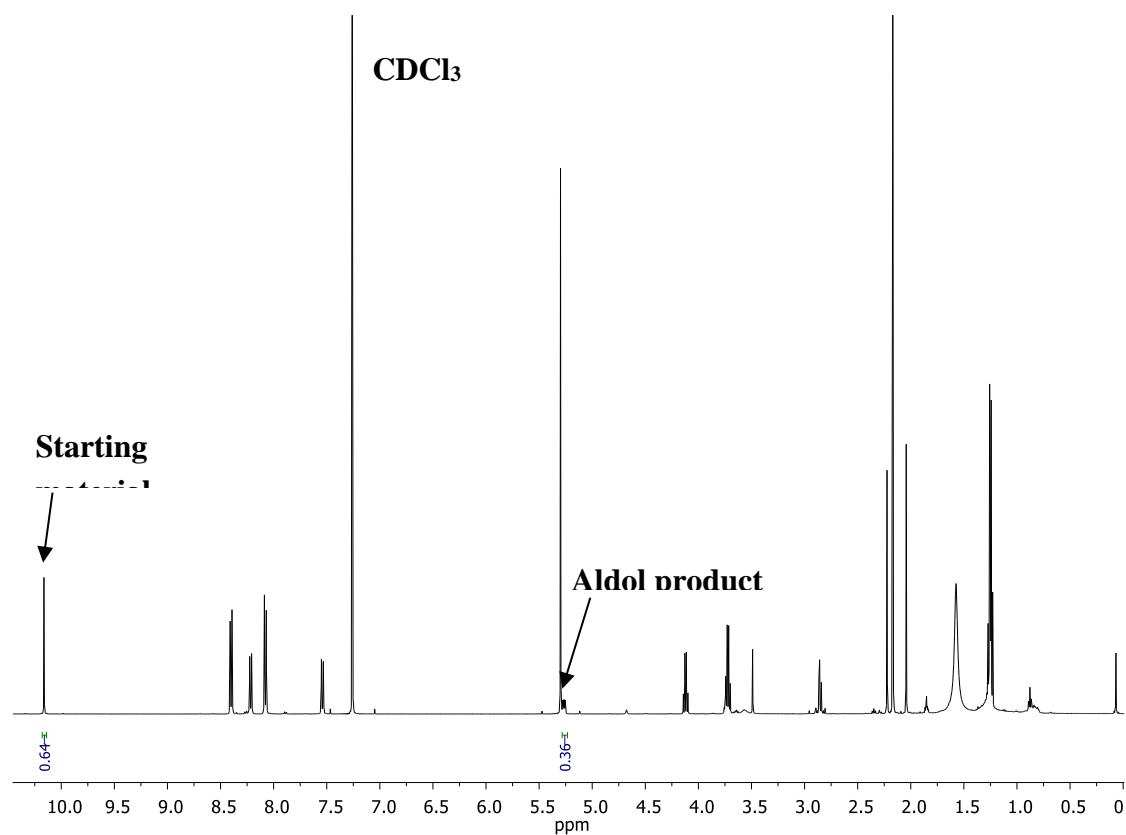

**Figure S20.**  $^1\text{H}$  NMR spectrum for the crude of reaction using catalyst 1.

**$^1\text{H}$  NMR Spectrum after Extraction of the Reaction Mixture between *p*-Nitrobenzaldehyde and Acetone (Sav, 0.1 mol%)**

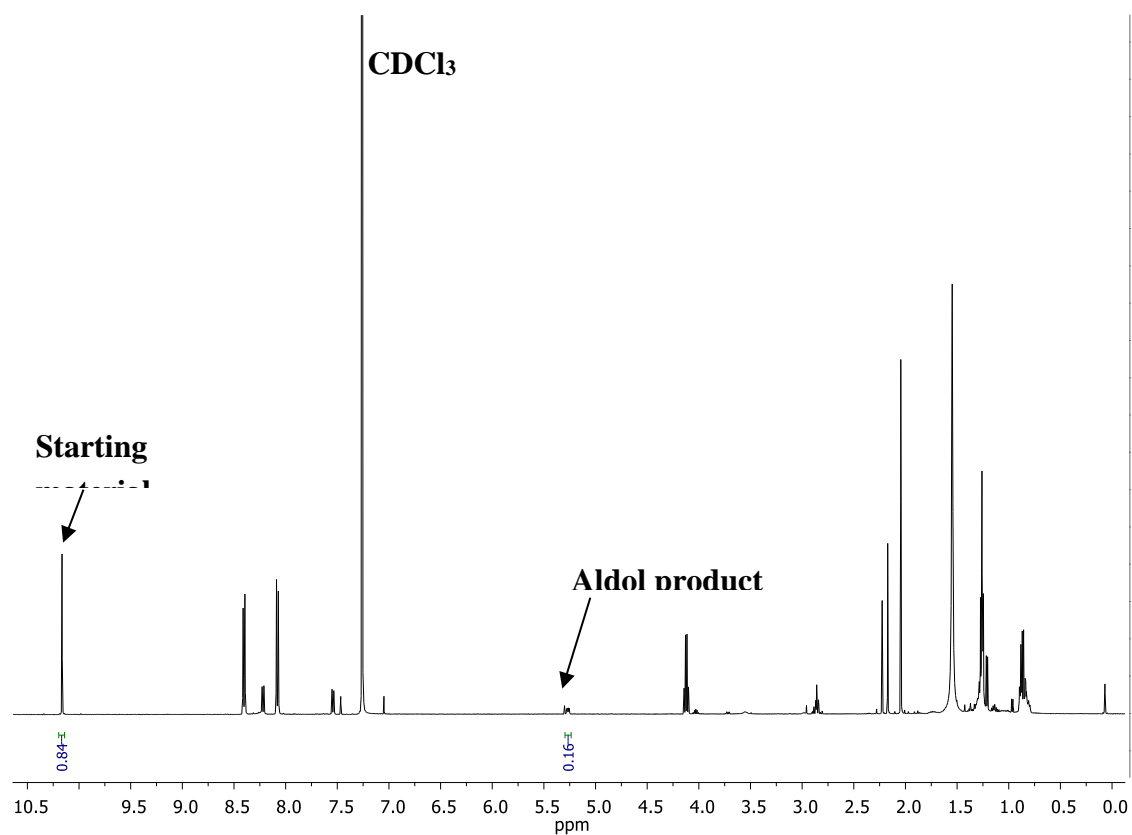

**Figure S21.**  $^1\text{H}$  NMR spectrum for the crude of reaction using Sav (0.1 mol%).

**$^1\text{H}$  NMR Spectrum after Extraction of the Reaction Mixture between *p*-Nitrobenzaldehyde and Acetone (Sav, 0.5 mol%)**

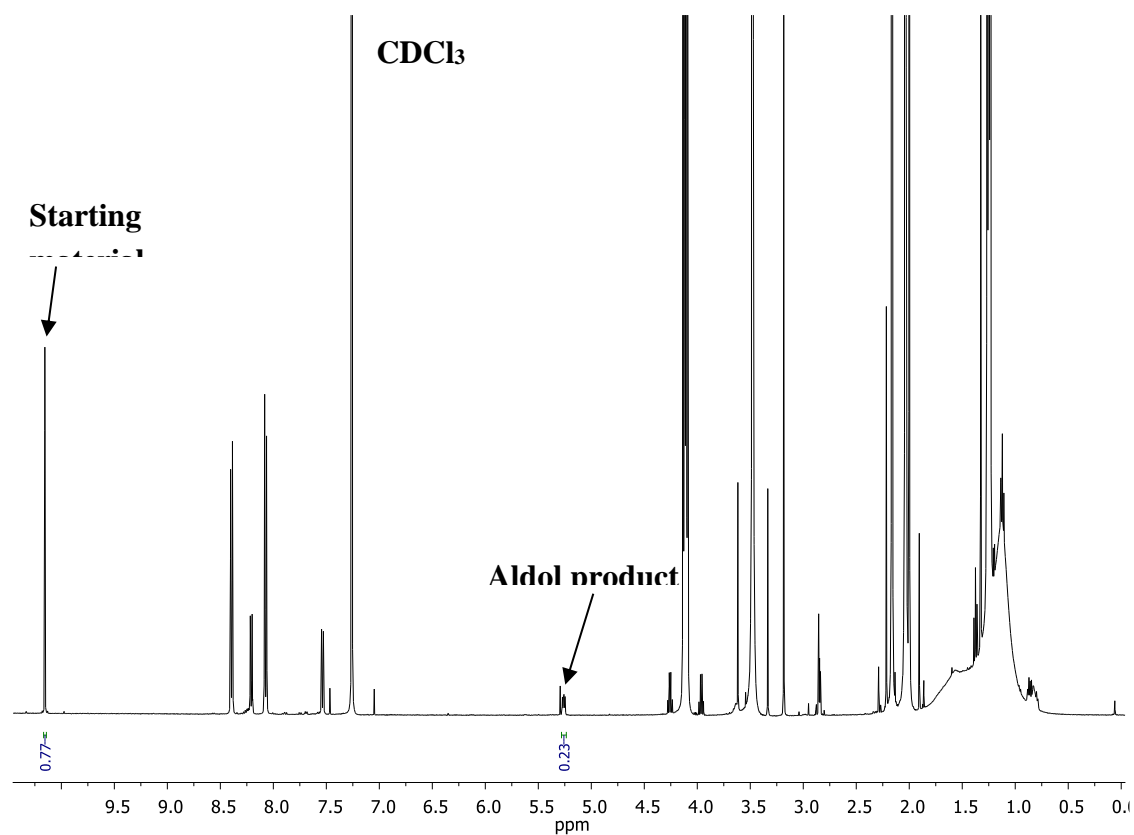

**Figure S22.**  $^1\text{H}$  NMR spectrum for the crude of reaction using Sav (0.5 mol%).

**$^1\text{H}$  NMR Spectrum after Extraction of the Reaction Mixture between *p*-Nitrobenzaldehyde and Acetone (Sav, 1 mol%)**

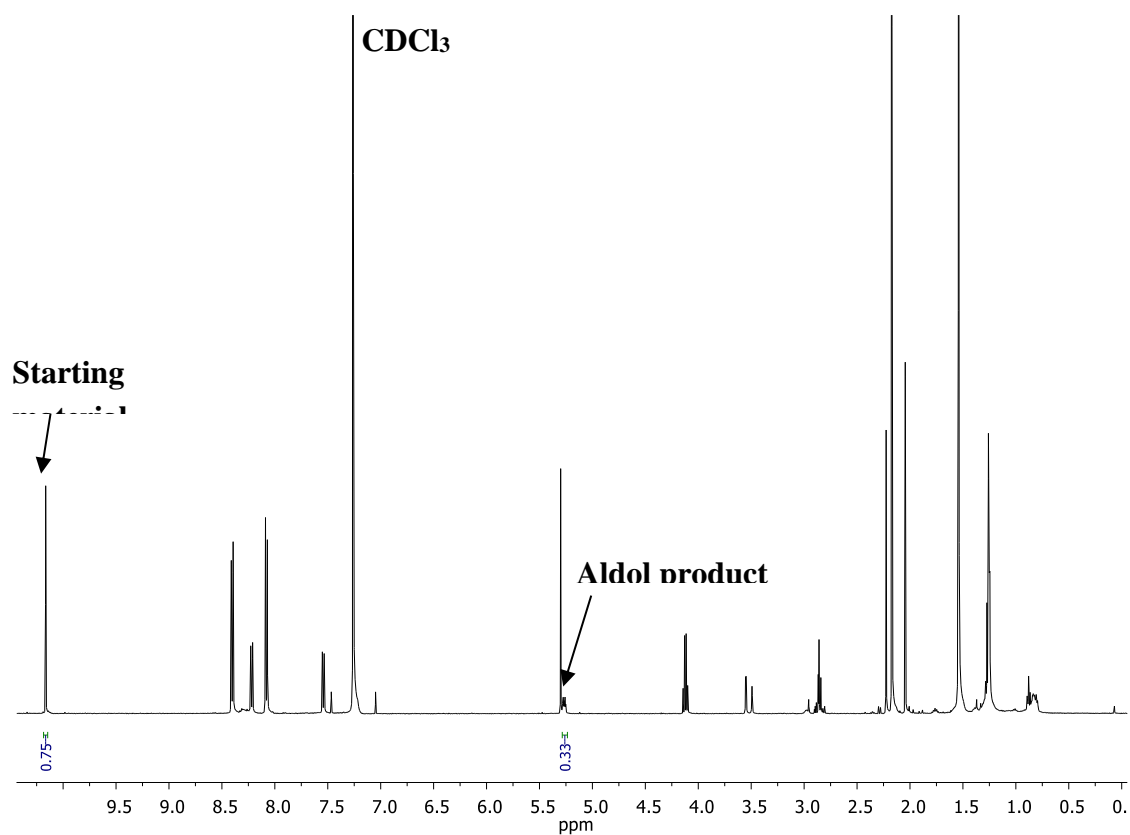

**Figure S23.**  $^1\text{H}$  NMR spectrum for the crude of reaction using Sav (1 mol%).

**$^1\text{H}$  NMR Spectrum after Extraction of the Reaction Mixture between *p*-Nitrobenzaldehyde and Acetone (Sav:1, 0.1 mol%)**

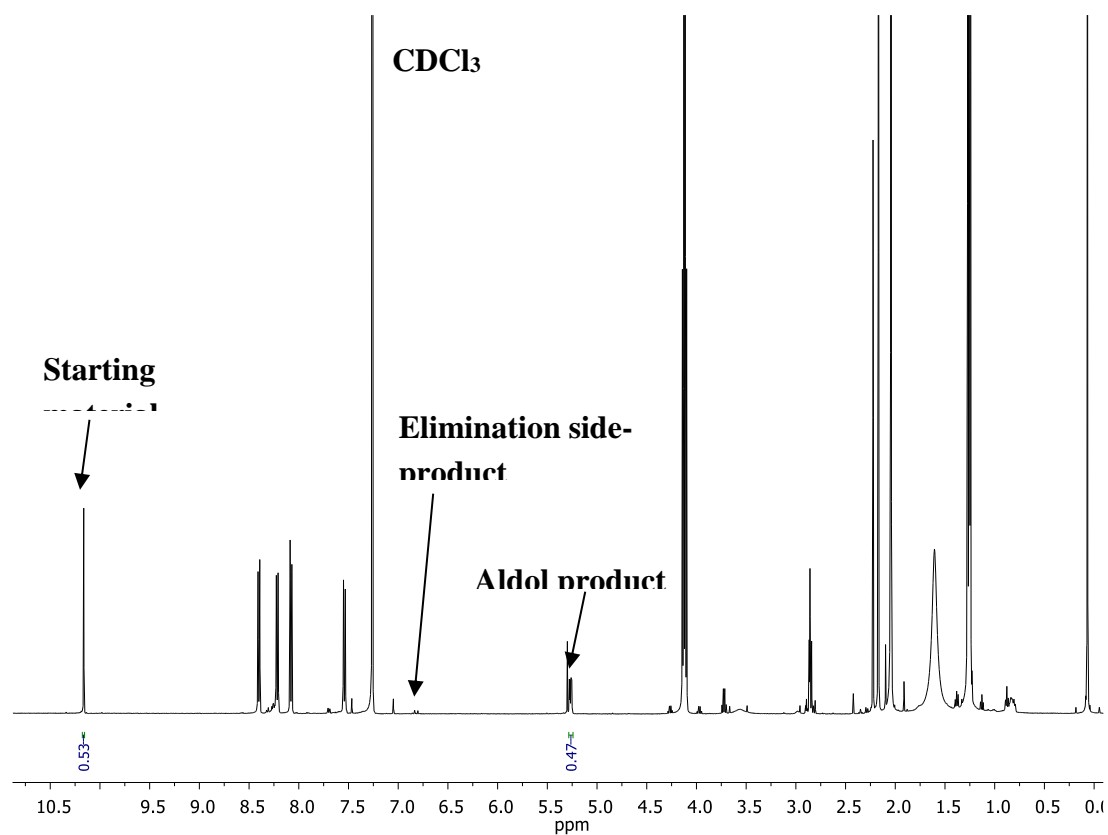

**Figure S24.**  $^1\text{H}$  NMR spectrum for the crude of reaction using Sav:1 (0.1 mol%).

**$^1\text{H}$  NMR Spectrum after Extraction of the Reaction Mixture between *p*-Nitrobenzaldehyde and Acetone (Sav:1, 0.5 mol%)**

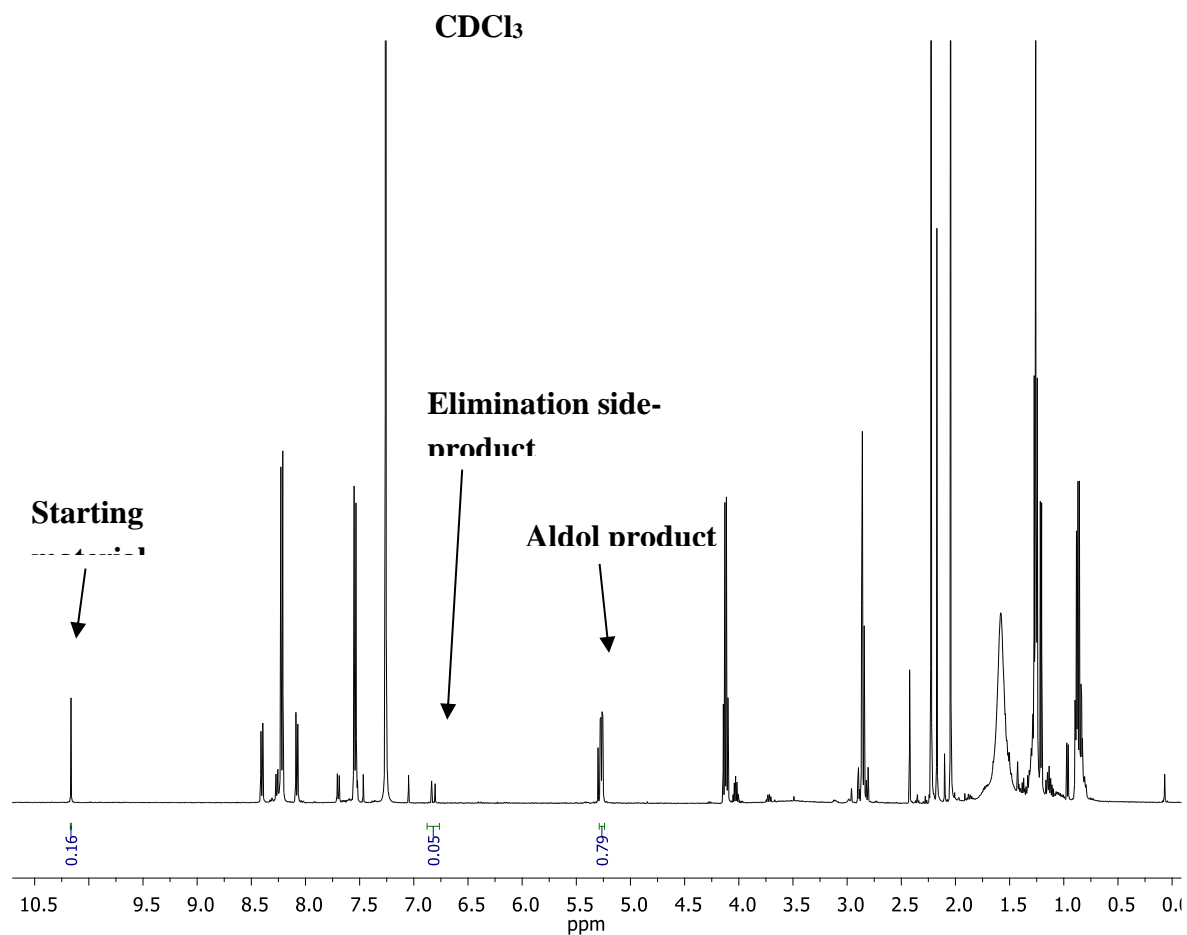

**Figure S25.**  $^1\text{H}$  NMR spectrum for the crude of reaction using Sav:1 (0.5 mol%).

**$^1\text{H}$  NMR Spectrum after Extraction of the Reaction Mixture between *p*-Nitrobenzaldehyde and Acetone (Sav:1, 1 mol%)**

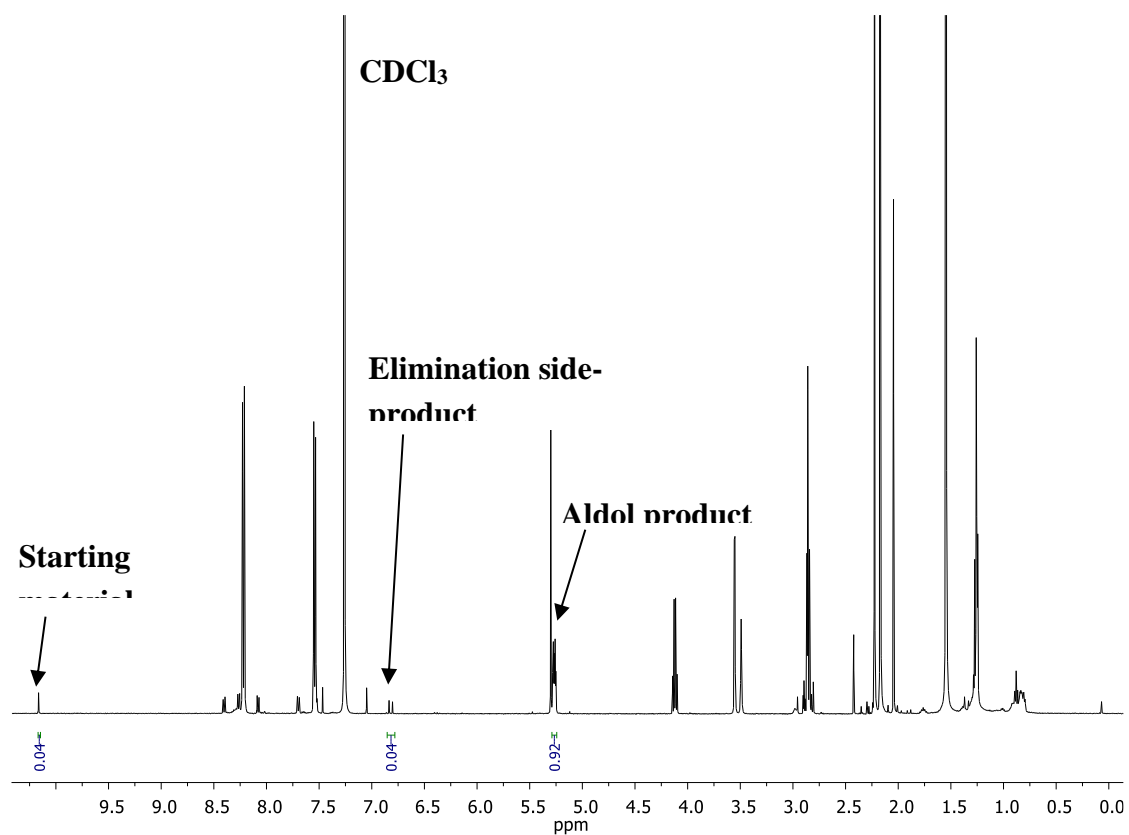

**Figure S26.**  $^1\text{H}$  NMR spectrum for the crude of reaction using Sav:1 (1 mol%).



**$^1\text{H}$  NMR Spectrum after Extraction of the Reaction Mixture between *p*-Nitrobenzaldehyde and Acetone (Sav:1, 1 mol%, and TFA 1 mol%)**

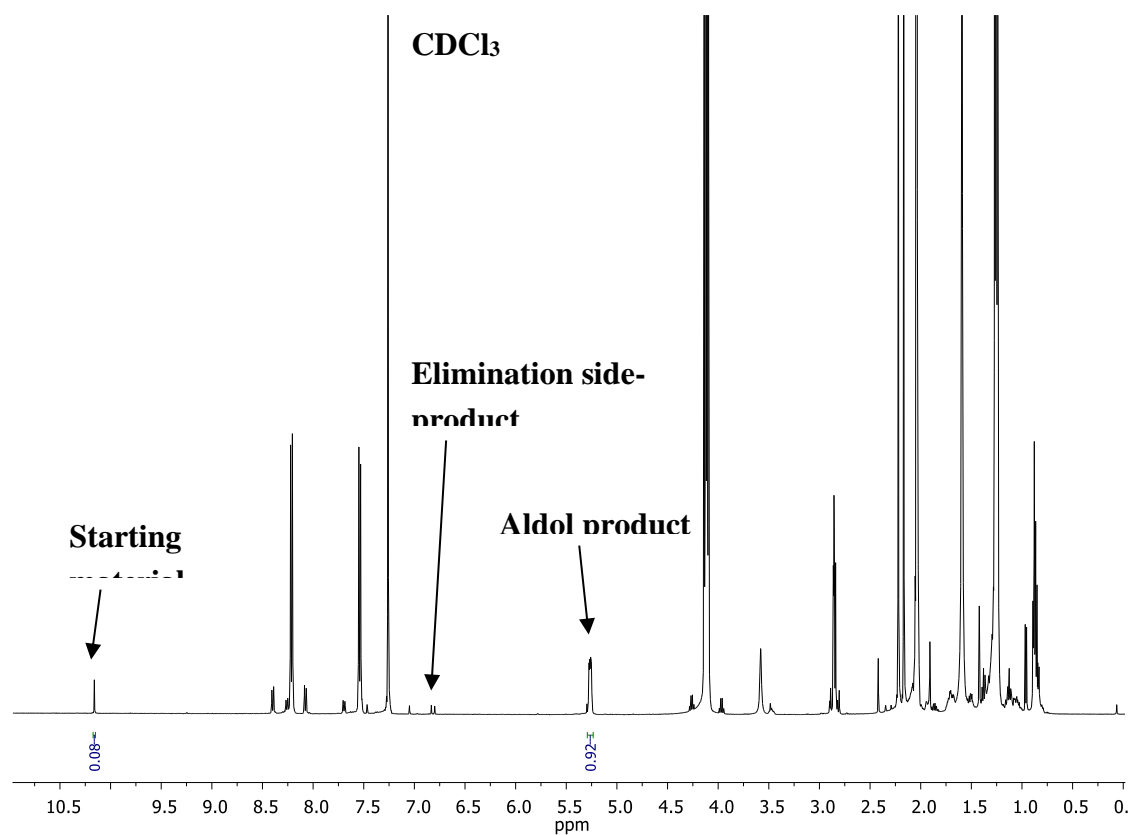

**Figure S27.**  $^1\text{H}$  NMR spectrum for the crude of reaction using Sav:1 (1 mol% + TFA).

**$^1\text{H}$  NMR Spectrum after Extraction of the Reaction Mixture between *p*-Nitrobenzaldehyde and Acetone (Sav:1, 1 mol%) at 10 °C**

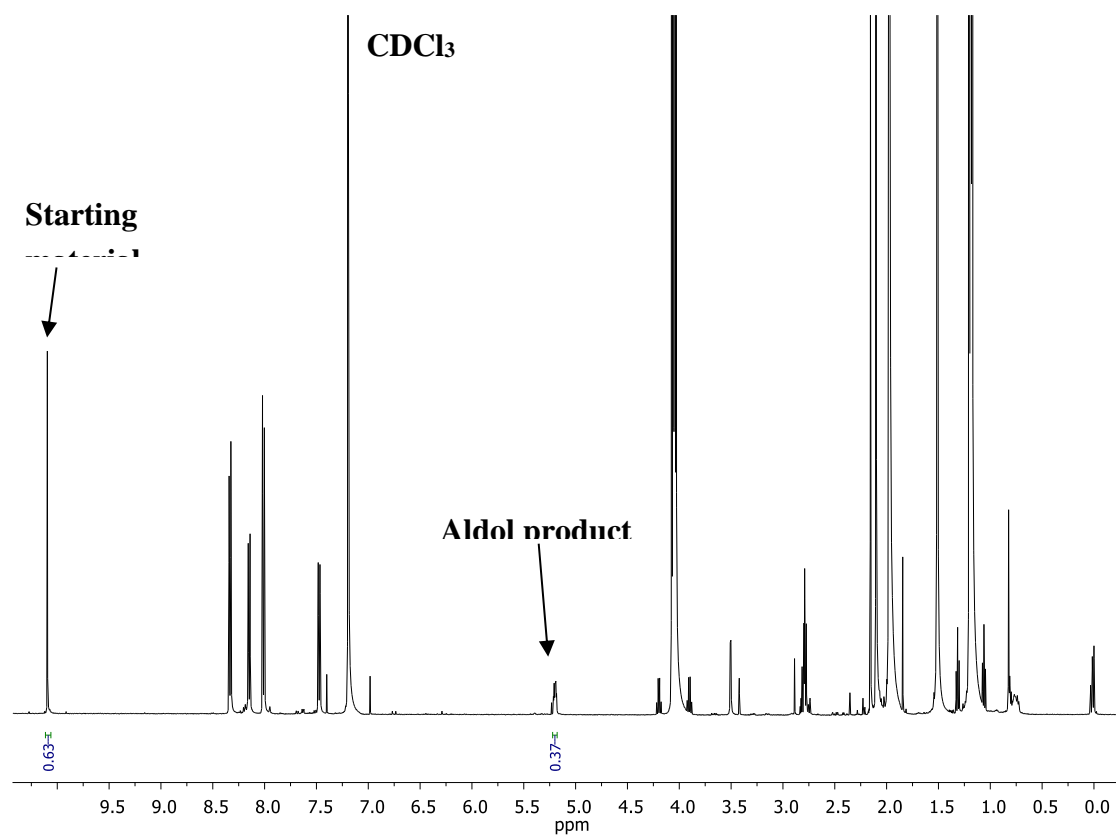

**Figure S28.**  $^1\text{H}$  NMR spectrum for the crude of reaction using Sav:1 (1 mol%, 10 °C).

**$^1\text{H}$  NMR Spectrum after Extraction of the Reaction Mixture between *p*-Nitrobenzaldehyde and 5 Equivalents of Acetone (Sav:1, 1 mol%, 25% Methanol)**

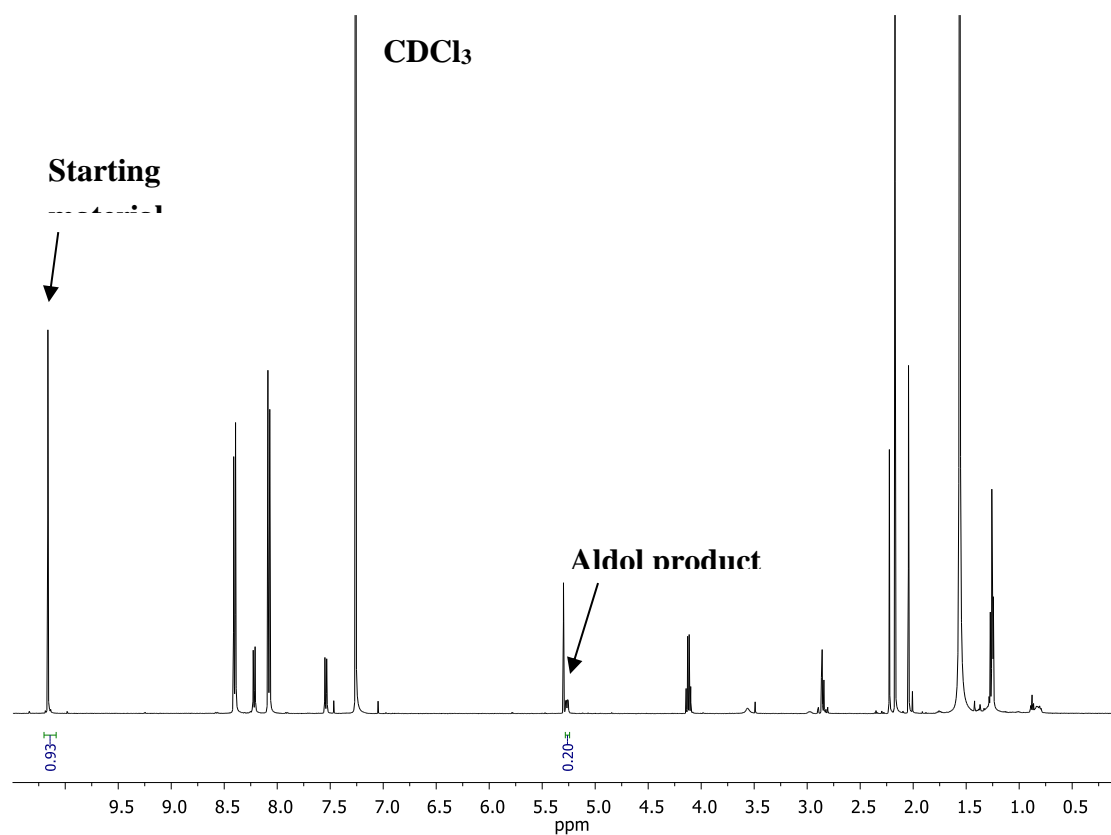

**Figure S29.**  $^1\text{H}$  NMR spectrum for the crude of reaction using Sav:1 (1 mol%, 5 equivalents of acetone and 25% methanol).

**<sup>1</sup>H NMR Spectrum after Extraction of the Reaction Mixture between *p*-Nitrobenzaldehyde and 5 Equivalents of Acetone (Sav:1, 1 mol%, 25% Acetonitrile)**

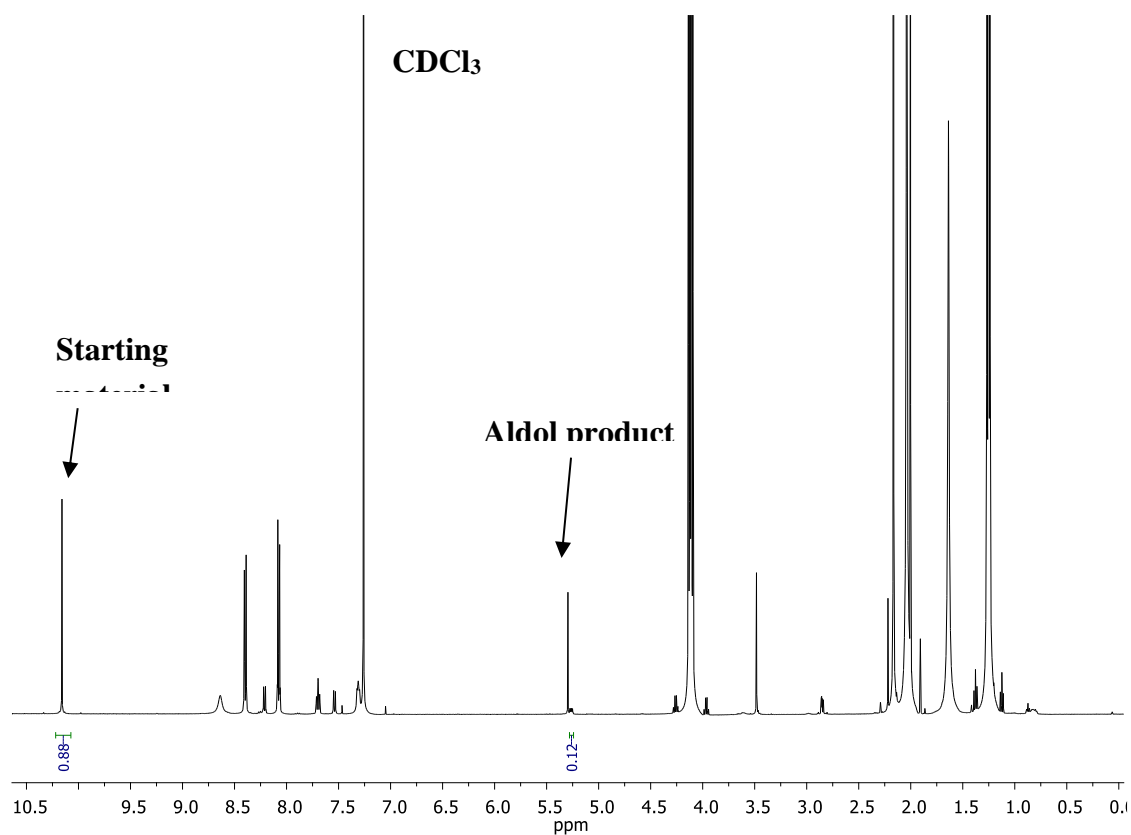

**Figure S30.** <sup>1</sup>H NMR spectrum for the crude of reaction using Sav:1 (1 mol%, 5 equivalents of acetone and 25% acetonitrile).

**<sup>1</sup>H NMR Spectrum after Extraction of the Reaction Mixture between *p*-Nitrobenzaldehyde and 5 Equivalents of Acetone (Sav:1, 1 mol%, 25% Iso-Propanol)**

Integrations of starting material and product has been made using the aromatic peaks as standard.

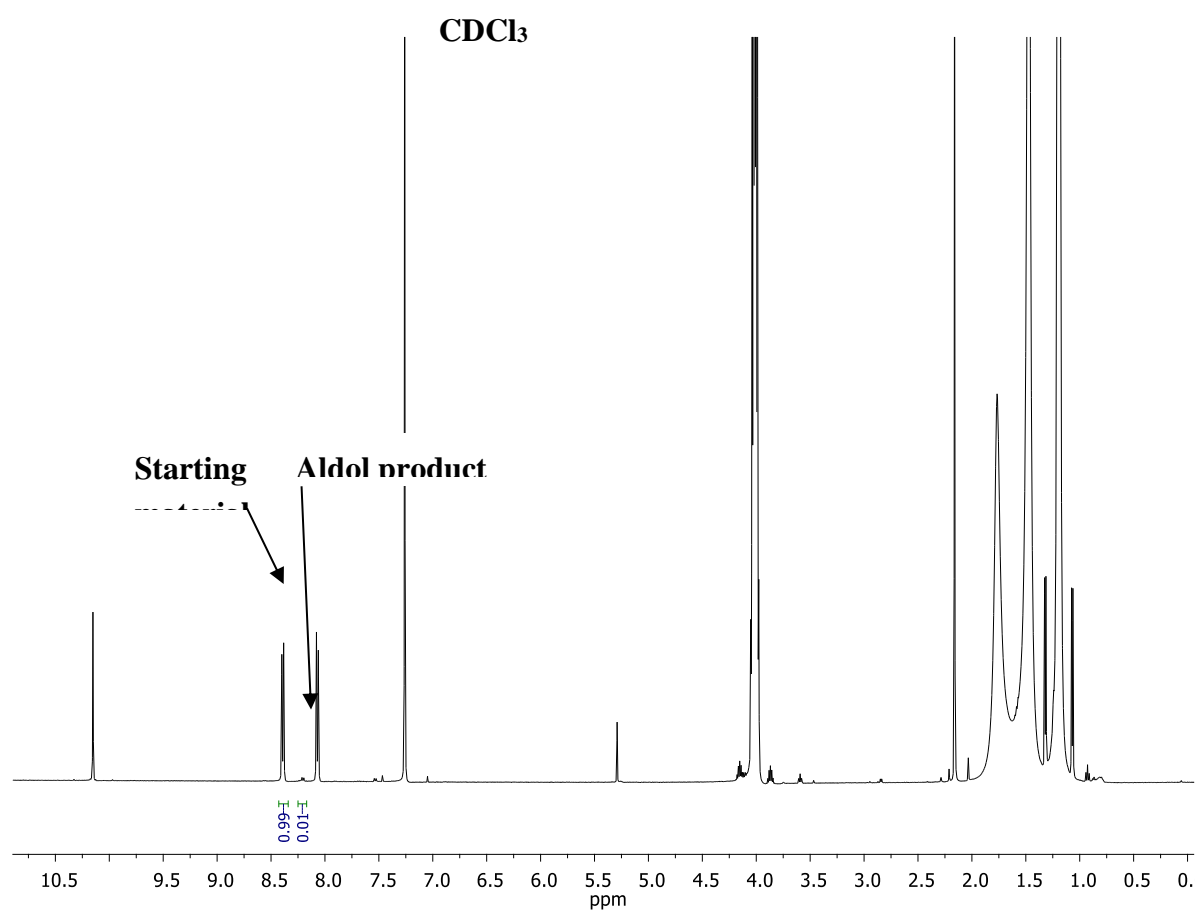

**Figure S31.** <sup>1</sup>H NMR spectrum for the crude of reaction using Sav:1 (1 mol%, 5 equivalents of acetone and 25% iso-propanol).

**<sup>1</sup>H NMR Spectrum after Extraction of the Reaction Mixture between *p*-Nitrobenzaldehyde and 10 Equivalents of Acetone (Sav:1, 1 mol%, 25% Iso-Propanol)**

Integrations of starting material and product has been made using the aromatic peaks as standard.

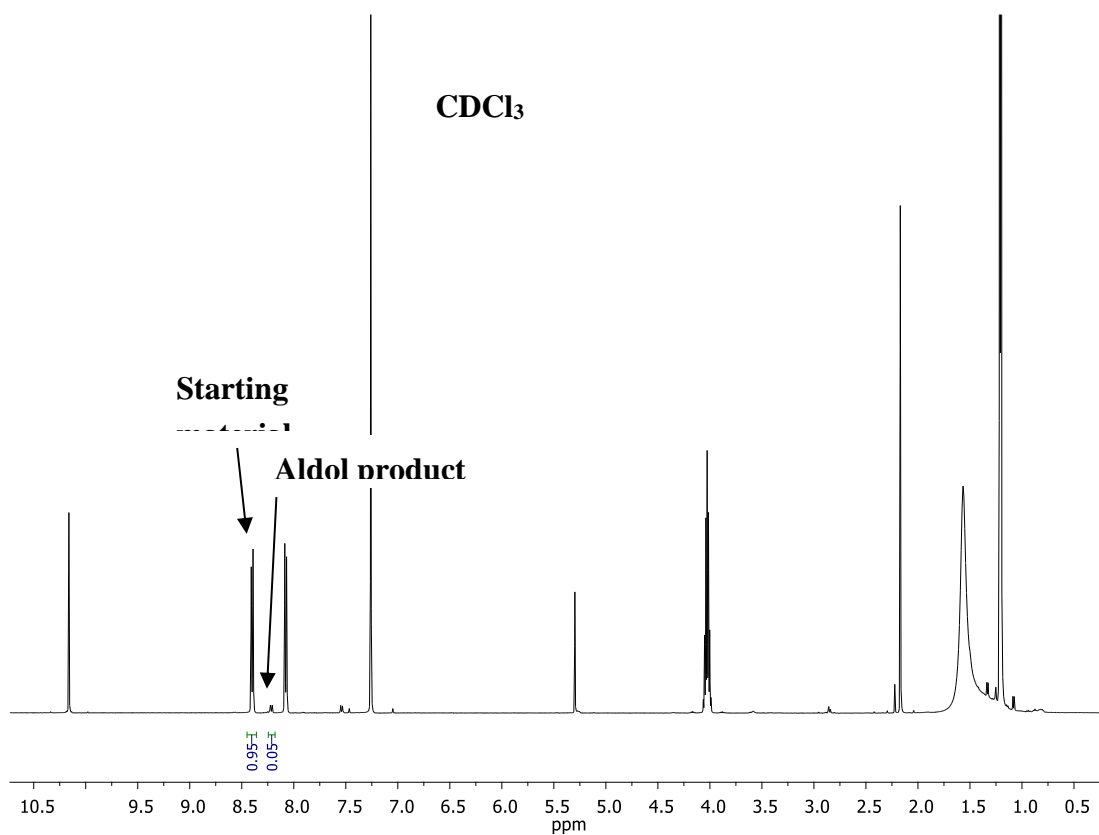

**Figure S32.** <sup>1</sup>H NMR spectrum for the crude of reaction using Sav:1 (1 mol%, 10 equivalents of acetone and 25% iso-propanol).

**$^1\text{H}$  NMR Spectrum after Extraction of the Reaction Mixture between *p*-Nitrobenzaldehyde and 20 Equivalents of Acetone (Sav:1, 1 mol%, 25% Iso-Propanol)**

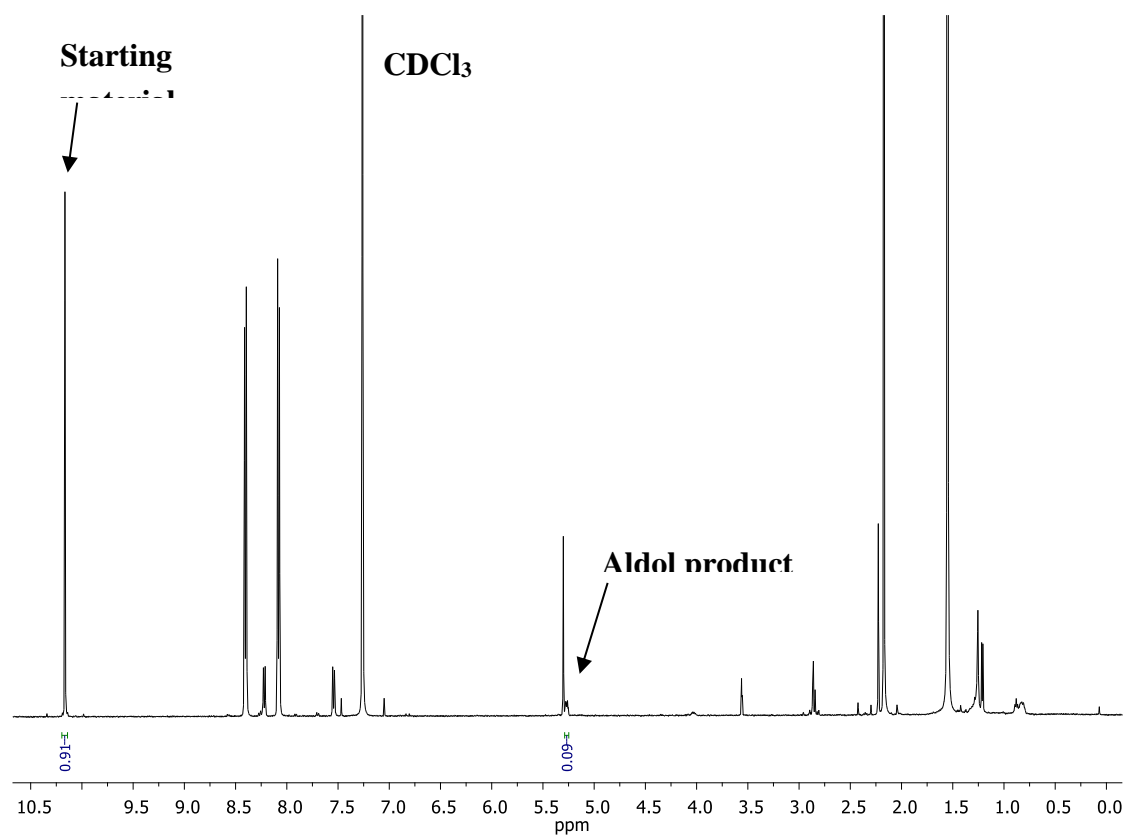

**Figure S33.**  $^1\text{H}$  NMR spectrum for the crude of reaction using Sav:1 (1 mol%, 20 equivalents of acetone and 25% iso-propanol).

**<sup>1</sup>H NMR Spectrum after Extraction of the Reaction Mixture between *p*-Nitrobenzaldehyde and 50 Equivalents of Acetone (Sav:1, 1 mol%, 25% Iso-Propanol)**

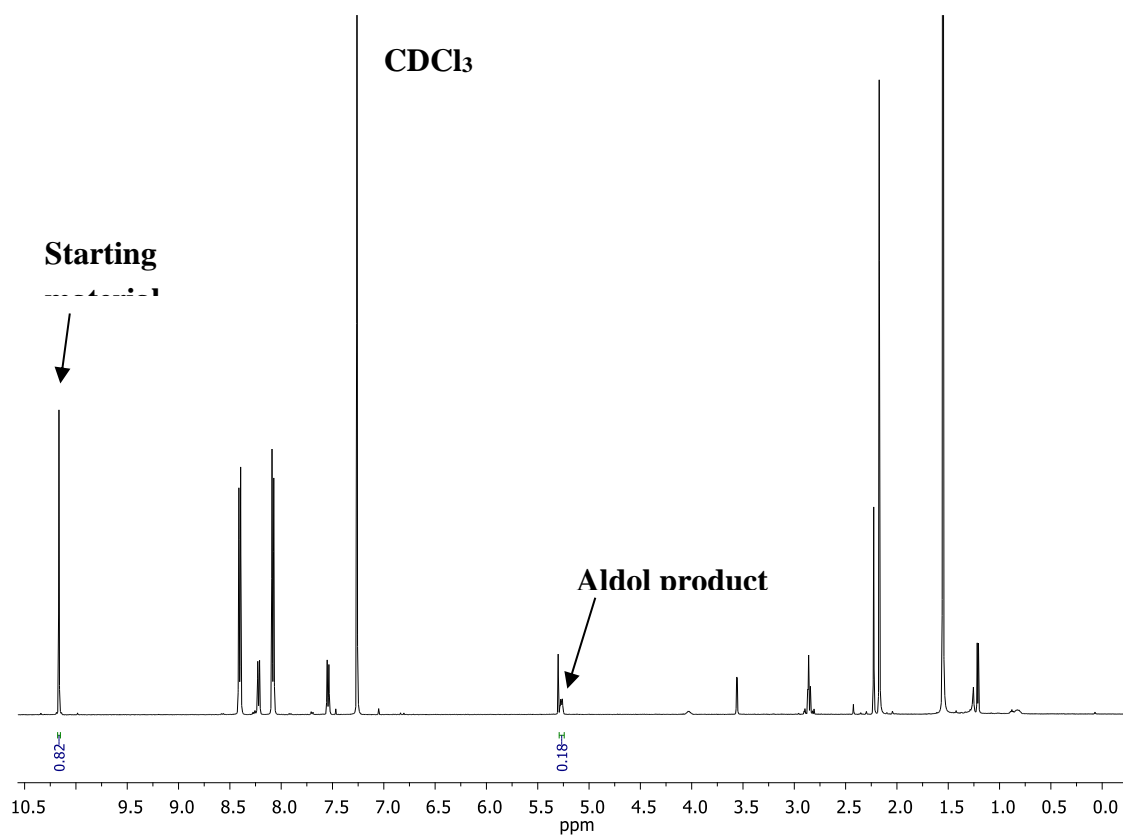

**Figure S34.** <sup>1</sup>H NMR spectrum for the crude of reaction using Sav:1 (1 mol%, 50 equivalents of acetone and 25% iso-propanol).



## Protein scope

$^1\text{H}$  NMR Spectrum after Extraction of the Reaction Mixture between *p*-Nitrobenzaldehyde and Acetone (T-rSav:1, 1 mol%)

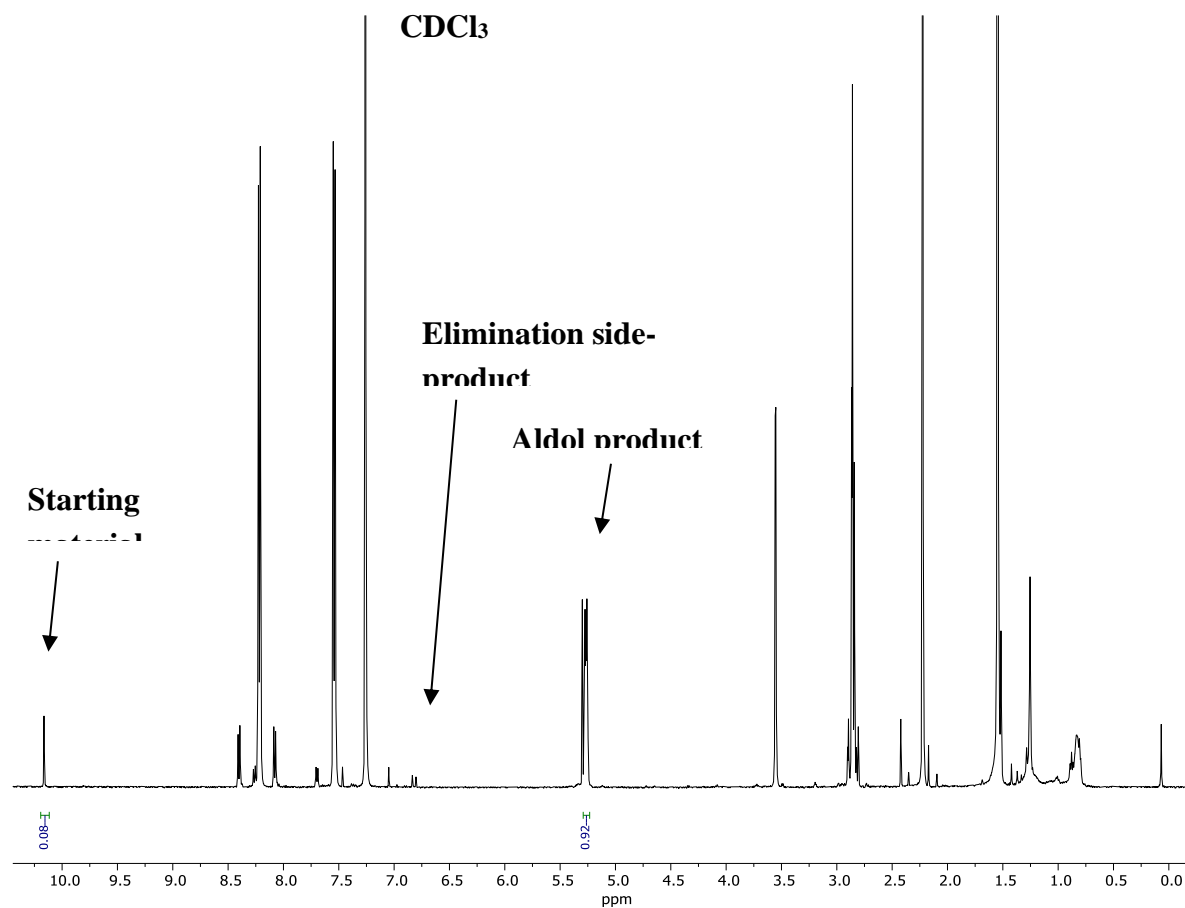

**Figure S35.**  $^1\text{H}$  NMR spectrum for the crude of reaction using T-rSav:1 (1 mol%).

**$^1\text{H}$  NMR Spectrum after Extraction of the Reaction Mixture between *p*-Nitrobenzaldehyde and Acetone (S112E:1, 1 mol%)**

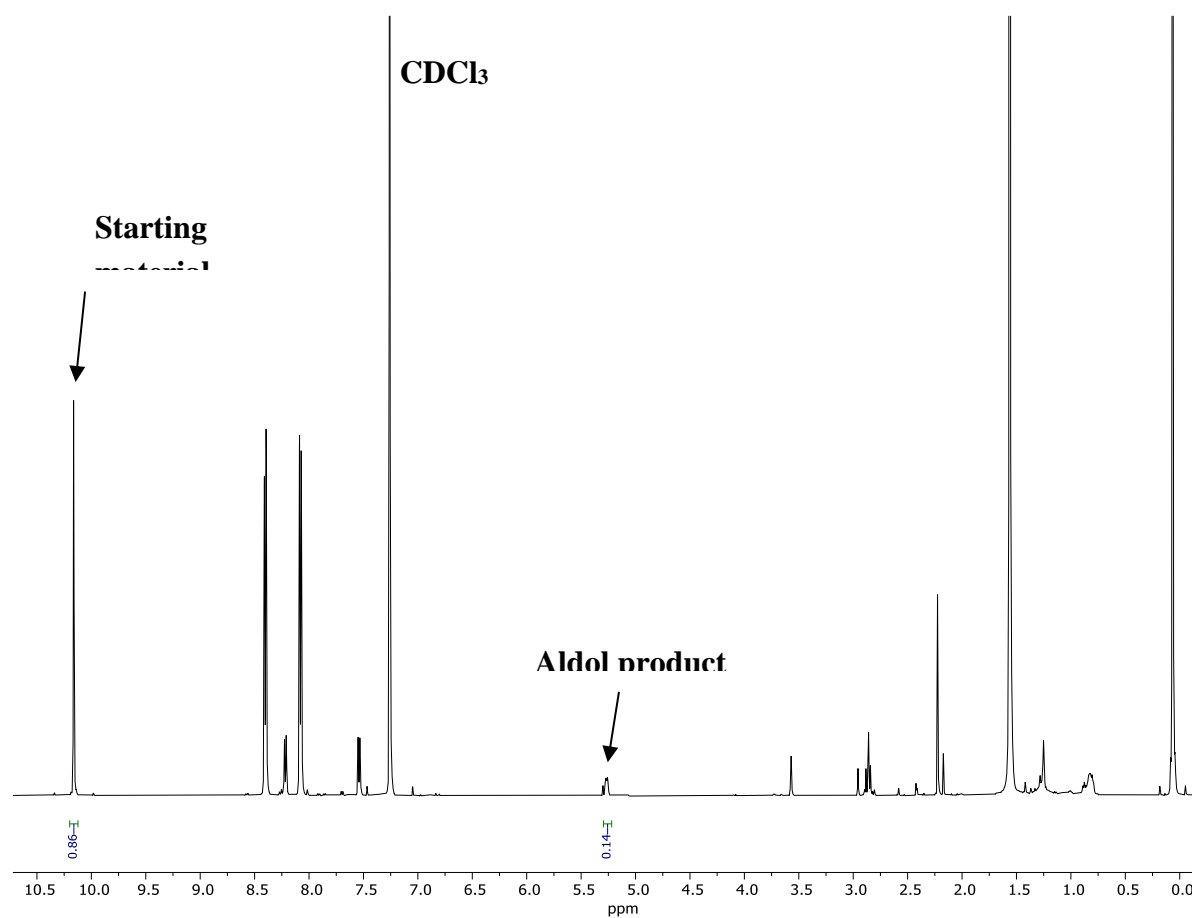

**Figure S36.**  $^1\text{H}$  NMR spectrum for the crude of reaction using S112E:1 (1 mol%).

**$^1\text{H}$  NMR Spectrum after Extraction of the Reaction Mixture between *p*-Nitrobenzaldehyde and Acetone (K121A:1, 1 mol%)**

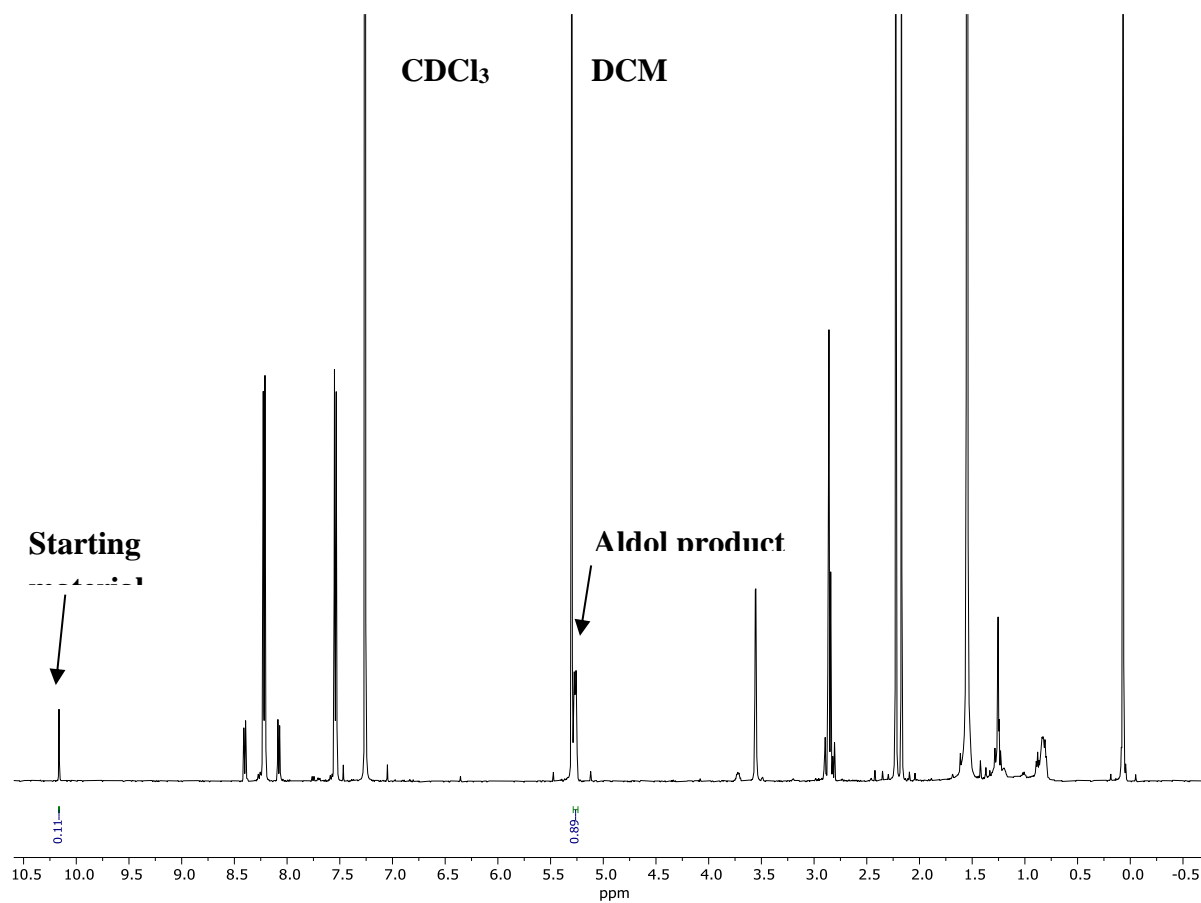

**Figure S37.**  $^1\text{H}$  NMR spectrum for the crude of reaction using K121A:1 (1 mol%).
